# Supplementary material for: Correlation of solid-state order to optoelectronic behavior in heterocyclic oligomers
Source: Royal Society of Chemistry journal article supplement (doi:10.1039/d2ce00560c), 2022-01-01
Supplement: d2ce00560c1.pdf [file d2ce00560c1.pdf]

# Correlation of Solid-State Order to Optoelectronic Behavior in Heterocyclic Oligomers

*Dilan Karunathilaka<sup>a</sup>, R.M.G. Rajapakse<sup>a</sup>, April E. Hardin<sup>a</sup>, Thomas More Sexton<sup>a</sup>, Nicholas E Sparks<sup>a</sup>, Jacquelyn J. Mosely<sup>a</sup>, Arnold L. Rheingold<sup>b</sup>, Nathan I. Hammer<sup>a</sup>, Gregory S. Tschumper<sup>a</sup>, and Davita L. Watkins<sup>a\*</sup>*

<sup>a</sup> Department of Chemistry and Biochemistry, University of Mississippi, University, MS 38677-1848, USA

<sup>b</sup> Department of Chemistry, University of California, San Diego, La Jolla, CA 92093-0358, USA

corresponding author emails: [tschumpr@olemiss.edu](mailto:tschumpr@olemiss.edu); [dwatkins@olemiss.edu](mailto:dwatkins@olemiss.edu)

## Table of contents pages

|                                                  |         |
|--------------------------------------------------|---------|
| General Summary                                  | S2      |
| Synthesis Details                                | S2- S4  |
| NMR Spectra                                      | S5- S15 |
| Cyclic Voltammograms                             | S16     |
| Computational Details and Results                | S17-32  |
| Spectroscopic Analysis and Solid-State Lifetimes | S33-34  |
| X-ray Single Crystal Data and Analysis           | S35-S69 |

**General Summary:** Reagents and solvents were purchased from commercial sources and used without further purification unless otherwise specified. Tetrahydrofuran (THF), dichloromethane (DCM), and dimethylformamide (DMF) were degassed in 20 L drums and passed through two sequential purification columns (activated alumina; molecular sieves for DMF) under a positive argon atmosphere. Thin-layer chromatography (TLC) was performed on SiO<sub>2</sub>-60 F254 aluminum plates with visualization by ultraviolet (UV) light or staining. Flash column chromatography was performed using Purasil SiO<sub>2</sub>-60, 230–400 mesh from Whatman. <sup>1</sup>H NMR and <sup>13</sup>C NMR spectra were recorded on a Bruker Avance-300 (300 MHz), Bruker Avance DRX-500 (500 MHz spectrometer) and were reported in ppm using solvent as an internal standard (CDCl<sub>3</sub> at 7.26 ppm for <sup>1</sup>H NMR and 77.15 ppm for <sup>13</sup>C NMR). Data reported as: s = singlet, d = doublet, t = triplet, q = quartet, p = pentet, m = multiplet, b = broad, ap = apparent; coupling constant(s) in Hz; integration.

**Synthetic Details:** Reported below are the full synthetic details for the preparation of Pyr<sub>z</sub>(FT)<sub>2</sub>, Pyr<sub>z</sub>(TT)<sub>2</sub>, MePyr<sub>z</sub>(FT)<sub>2</sub>, and MePyr<sub>z</sub>(TT)<sub>2</sub>.

**2-Bromo-5-hexylthiophene (2)** To N-Bromosuccinimide (4.65 g, 26.15 mmol) CHCl<sub>3</sub>/Acetic acid (30 mL: 15 mL) was added and chilled in an ice bath for 15 minutes. 2-Hexylthiophene (1) (4.01 g, 23.83 mmol) was added and chilled for 15 minutes. The mixture was gradually heated up to 50 °C and refluxed for 30 minutes. The mixture was then cooled to room temperature. After 90 minutes, the mixture was quenched with Na<sub>2</sub>HCO<sub>3</sub> (100 mL), extracted with CHCl<sub>3</sub> (100 mL) and the organic layer was dried over Na<sub>2</sub>SO<sub>4</sub> and evaporated under vacuum. Yellow color solution (5.76 g, 23.39 mmol, yield = 98%). <sup>1</sup>H NMR: (CDCl<sub>3</sub>, 500 MHz) δ 6.84 (d, *J* = 3.6 Hz, 1H), δ 6.53 (d, *J* = 3.5 Hz, 1H), δ 2.74 (t, *J* = 7.7 Hz, 2H), δ 1.62 (p, *J* = 7.5 Hz, 2H), δ 1.41 – δ 1.17 (m, 6H), δ 0.88 (t, *J* = 6.7 Hz, 3H). <sup>13</sup>C NMR: (CDCl<sub>3</sub>, 500 MHz) δ 147.72, 129.46, 124.42, 108.66, 31.64, 31.54, 30.54, 30.45, 28.78, 22.69, 14.19.

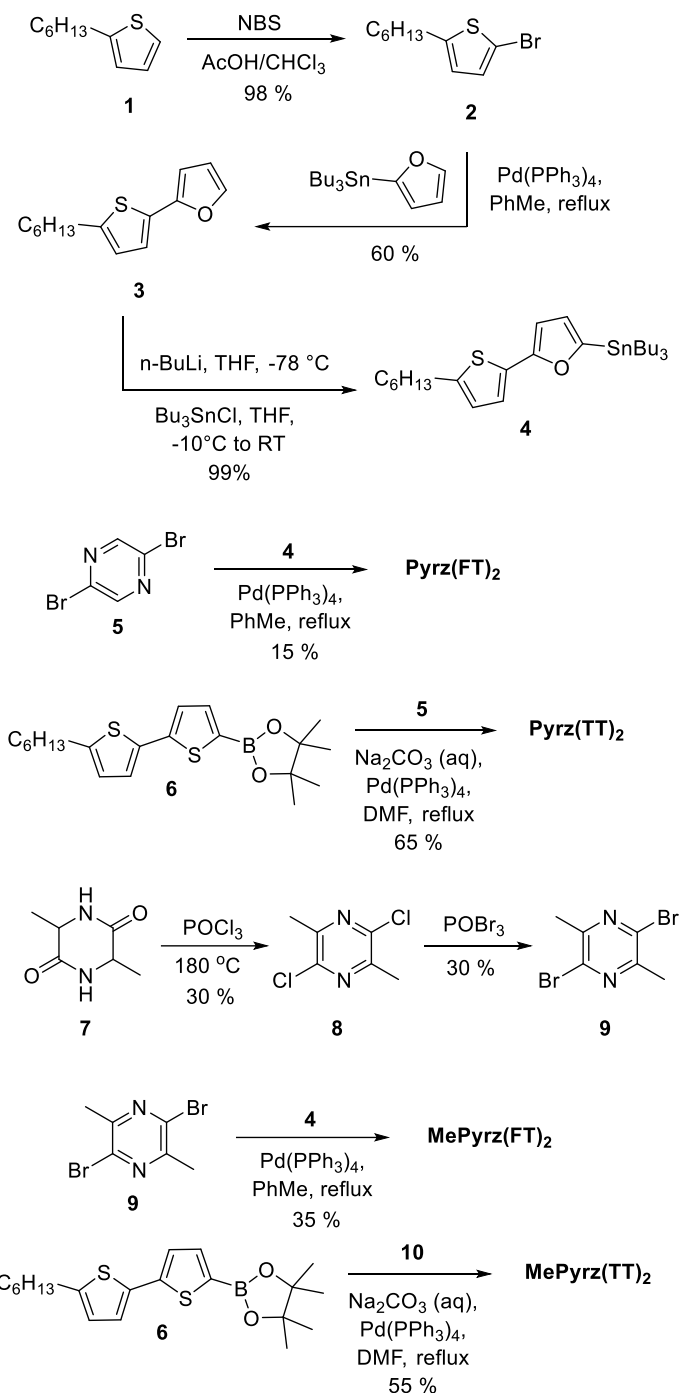

**Scheme 1.** Synthesis of heterocyclic oligomers.

Yellow color solution (5.76 g, 23.39 mmol, yield = 98%). <sup>1</sup>H NMR: (CDCl<sub>3</sub>, 500 MHz) δ 6.84 (d, *J* = 3.6 Hz, 1H), δ 6.53 (d, *J* = 3.5 Hz, 1H), δ 2.74 (t, *J* = 7.7 Hz, 2H), δ 1.62 (p, *J* = 7.5 Hz, 2H), δ 1.41 – δ 1.17 (m, 6H), δ 0.88 (t, *J* = 6.7 Hz, 3H). <sup>13</sup>C NMR: (CDCl<sub>3</sub>, 500 MHz) δ 147.72, 129.46, 124.42, 108.66, 31.64, 31.54, 30.54, 30.45, 28.78, 22.69, 14.19.

**2-(5-Hexyl-2-thienyl)-furan (3)** To 2-Bromo-5-hexylthiophene (2) (5.61 g, 22.84 mmol), Pd(PPh<sub>3</sub>)<sub>4</sub> (1.64 g, 1.42 mmol) and dry toluene (150 mL) were added and stirred for 20 minutes. 2-(Tributylstannyl)furan (8.7 mL, 27.63 mmol) was added dropwise. The mixture was gradually heated up to 120 °C and refluxed overnight. The mixture was then cooled to room temperature. The reaction mixture was quenched with DI water and extracted with diethyl ether. The mixture was filtered through an activated carbon layer and dried over Na<sub>2</sub>SO<sub>4</sub>. The crude product was purified using column chromatography (Eluent: Hexane). Yellow color solution. (3.14 g, 59.88 mmol, yield = 60%) <sup>1</sup>H NMR: (CDCl<sub>3</sub>, 500 MHz) δ 7.37 (d, *J* = 2.1 Hz, 1H), δ 7.05 (d, *J* = 3.5 Hz, 1H), δ 6.69 (d, *J* = 3.5 Hz, 1H), δ 6.44-6.37 (m, 2H), δ 2.80 (t, *J* = 7.6 Hz, 2H), δ 1.66 (p, *J* = 7.6 Hz, 2H), δ 1.43 – 1.26 (m, 6H), δ 0.90 (t, *J* = 5.4 Hz, 3H).

**Tributyl(5-(5-hexylthiophen-2-yl)-furan-2-yl)-stannane (4)** To the solution of 2-(5-Hexyl-2-thienyl)-furan (3) (2.5 g, 10.67 mmol), tetrahydrofuran (60 mL) was added and kept in an ice bath (-78 °C). Then n-Butyllithium (5.5 mL, 13.87 mmol) was added dropwise. Set up was covered using Al foil. After stirring at -78 °C for 1 hour, the mixture was warmed up to -10 °C. Tributyltin chloride (3.2 mL, 11.74 mmol) was added dropwise. The reaction mixture was kept overnight to warm up to room temperature. The reaction mixture was quenched with DI water (50 mL), extracted with Diethyl ether and the organic layer was dried over Na<sub>2</sub>SO<sub>4</sub> and evaporated under vacuum. Orange color solution (5.6 g, 10.67 mmol, yield = 99%). <sup>1</sup>H NMR: (CDCl<sub>3</sub>, 500 MHz) δ 7.03 (d, *J* = 3.6 Hz, 1H), δ 6.68 (d, *J* = 3.7 Hz, 1H), δ 6.55 (d, *J* = 3.2 Hz, 1H), δ 6.43 (d, *J* = 3.3 Hz, 1H).

**2,5-Bis(5-(5-hexylthiophen-2-yl)-furan-2-yl)-pyrazine (Pyrz(FT)<sub>2</sub>)**, Under nitrogen, to a three-neck round bottom flask, Tributyl(5-(5-hexylthiophen-2-yl)-furan-2-yl)-stannane (4) (5.6 g, 10.67 mmol) 2,5-Dibromopyrazine (5) (1.65 g, 6.94 mmol) and Pd(PPh<sub>3</sub>)<sub>4</sub> (0.74 g/ 0.64 mmol) was added. Dry Toluene (75 mL) was added via a syringe. The reaction was done under reflux at 120 °C for 24 hrs. The reaction mixture was quenched with aqueous NaHCO<sub>3</sub>. The product was extracted with CHCl<sub>3</sub>. The organic layer then mixed with DI water and extracted 3 times and filtered through Celite. The organic layer was dried over anhydrous Na<sub>2</sub>SO<sub>4</sub> and filtered under vacuum filtration. The organic layer was roto-evaporated. An orange color solid was obtained. To the solid product, Toluene (5 mL) and Hexane (20 mL) were added and placed, and ultra-sonicated to dissolve. Then another 10 ml of Hexane was added and filtered. Then, the filtrate was again subjected to filtration. The precipitate was taken and purified by column chromatography. (Eluent: Acetone: Hexane 1:4) Orange color solid <sup>1</sup>H NMR: (CDCl<sub>3</sub>, 500 MHz) δ 8.92 (s, 2H), δ 7.22 (d, *J* = 3.6 Hz, 2H), δ 7.16 (d, *J* = 3.5 Hz, 2H), δ 6.76 (d, *J* = 3.5 Hz, 2H), δ 6.59 (d, *J* = 3.6 Hz, 2H), δ 2.83 (t, *J* = 7.6 Hz, 4H), δ 1.75 – 1.64 (m, 4H), δ 1.46 – 1.11 (m, 12H), δ 0.90 (t, 6H) <sup>13</sup>C NMR: (CDCl<sub>3</sub>, 500 MHz) δ 151.47, 150.15, 146.68, 141.94, 139.50, 130.41, 125.06, 123.16, 112.66, 107.14, 31.70, 28.88, 28.44, 22.72, 14.23.

**2,5-Bis(5'-hexyl-[2,2'-bithiophen]-5-yl)pyrazine (Pyrz(TT)<sub>2</sub>)**, Under nitrogen, to a three neck round bottom flask, 2-(5'-hexyl-[2,2'-bithiophen]-5-yl)-4,4,5,5-tetramethyl-1,3,2-dioxaborolane (6) (1.51 g, 4.01 mmol), 2,5-Dibromopyrazine (5) (0.58 g, 2.43 mmol), Pd(PPh<sub>3</sub>)<sub>4</sub> (0.46 g, 0.40 mmol), Na<sub>2</sub>CO<sub>3</sub> (0.45 g, 4.25 mmol) and H<sub>2</sub>O (2.3 mL) was added and stirred for 10 minutes. Then Dimethylformamide (25 mL) was added and gradually heated up to 110 °C and refluxed for 24 hours. The reaction mixture was quenched with deionized water (50 mL) and extracted with chloroform three times and organic layer was separated. Orange color solid was floated on the surface of the organic layer. It was filtered. Light orange solid (0.68 g, 1.18 mmol, yield = 60%) (CDCl<sub>3</sub>, 500 MHz) δ 8.81 (s, 2H), δ 7.54 (d, J = 3.9 Hz, 2H), δ 7.13 (d, J = 3.9 Hz, 2H), δ 7.09 (d, J = 3.6 Hz, 2H), δ 6.72 (d, J = 3.6 Hz, 2H), δ 2.81 (t, J = 7.6 Hz, 4H), δ 1.69 (p, J = 7.6 Hz, 4H), δ 1.45 – 1.28 (m, 12H), δ 0.90 (t, 6H) <sup>13</sup>C NMR: (CDCl<sub>3</sub>, 500 MHz) δ 146.70, 145.69, 141.29, 139.36, 139.34, 134.54, 126.06, 125.22, 124.39, 124.16, 31.72, 30.39, 28.92, 22.73, 14.24.

**2,5-bis(5-(5-hexylthiophen-2-yl)furan-2-yl)-3,6-dimethylpyrazine (MePyrz(FT)<sub>2</sub>)** Under nitrogen, to a round bottom flask, Tributyl(5-(5-hexylthiophen-2-yl)-furan-2-yl)-stannane (4) (1.04 g, 2.0 mmol) 2,5-dibromo-3,6-dimethylpyrazine (10) (300 mg, 1.12 mmol) and Pd(PPh<sub>3</sub>)<sub>4</sub> (115 mg, 0.1 mmol) was added. Dry Toluene (15 mL) was added via a syringe. The reaction was done under reflux at 120 °C for 24 hrs. The reaction mixture was quenched with aqueous NaHCO<sub>3</sub>. The product was extracted with CHCl<sub>3</sub>. The organic layer then mixed with DI water and extracted 3 times and filtered through Celite. The organic layer was dried over anhydrous Na<sub>2</sub>SO<sub>4</sub> and filtered under vacuum filtration. The organic layer was evaporated under vacuum. An orange color solid was obtained. The solid was purified by column chromatography. (Eluent: Ethyl acetate: Hexane 1:20) Orange color solid. (0.20 g, 0.33 mmol, yield = 35%) <sup>1</sup>H NMR (300 MHz, CDCl<sub>3</sub>) δ 7.22 – 7.16 (m, 4H), 6.75 (d, J = 3.6 Hz, 2H), 6.60 (d, J = 3.6 Hz, 2H), 2.90 (s, 6H), 2.83 (t, J = 7.6 Hz, 4H), 1.71 (p, J = 7.5 Hz, 4H), 1.37 – 1.15 (m, 12H), 0.91 (t, 6H).

**2,5-Bis(5'-hexyl-[2,2'-bithiophen]-5-yl)-3,6-dimethylpyrazine (MePyrz(TT)<sub>2</sub>)** Under nitrogen, to a round bottom flask, 2-(5'-hexyl-[2,2'-bithiophen]-5-yl)-4,4,5,5-tetramethyl-1,3,2-dioxaborolane (6) (388 mg, 1.02 mmol), 2,5-dibromo-3,6-dimethylpyrazine (10) (150 mg, 0.56 mmol), Pd(PPh<sub>3</sub>)<sub>4</sub> (120 mg, 0.10 mmol), Na<sub>2</sub>CO<sub>3</sub> (113 mg, 1.07 mmol) and H<sub>2</sub>O (0.6 mL) was added and stirred for 10 minutes. Then dry dimethylformamide (6 mL) was added and gradually heated up to 110 °C and refluxed for 24 hours. The reaction mixture was quenched with deionized water (50 mL) and extracted with chloroform three times and organic layer was separated. Orange color solid was floated on the surface of the organic layer. solid was filtered. Orange solid (170 mg, 0.28 mmol, yield = 55%) <sup>1</sup>H NMR (300 MHz, CDCl<sub>3</sub>) δ 7.45 (d, J = 4.0 Hz, 2H), 7.14 (d, J = 4.0 Hz, 2H), 7.10 (d, J = 3.6 Hz, 2H), 6.72 (d, J = 3.6 Hz, 2H), 2.94 – 2.63 (m, 10H), 1.70 (p, J = 7.4 Hz, 4H), 1.40 – 1.20 (m, 12H), 0.89 (t, 6H).

# $^1\text{H}$ and $^{13}\text{C}$ NMR Spectra

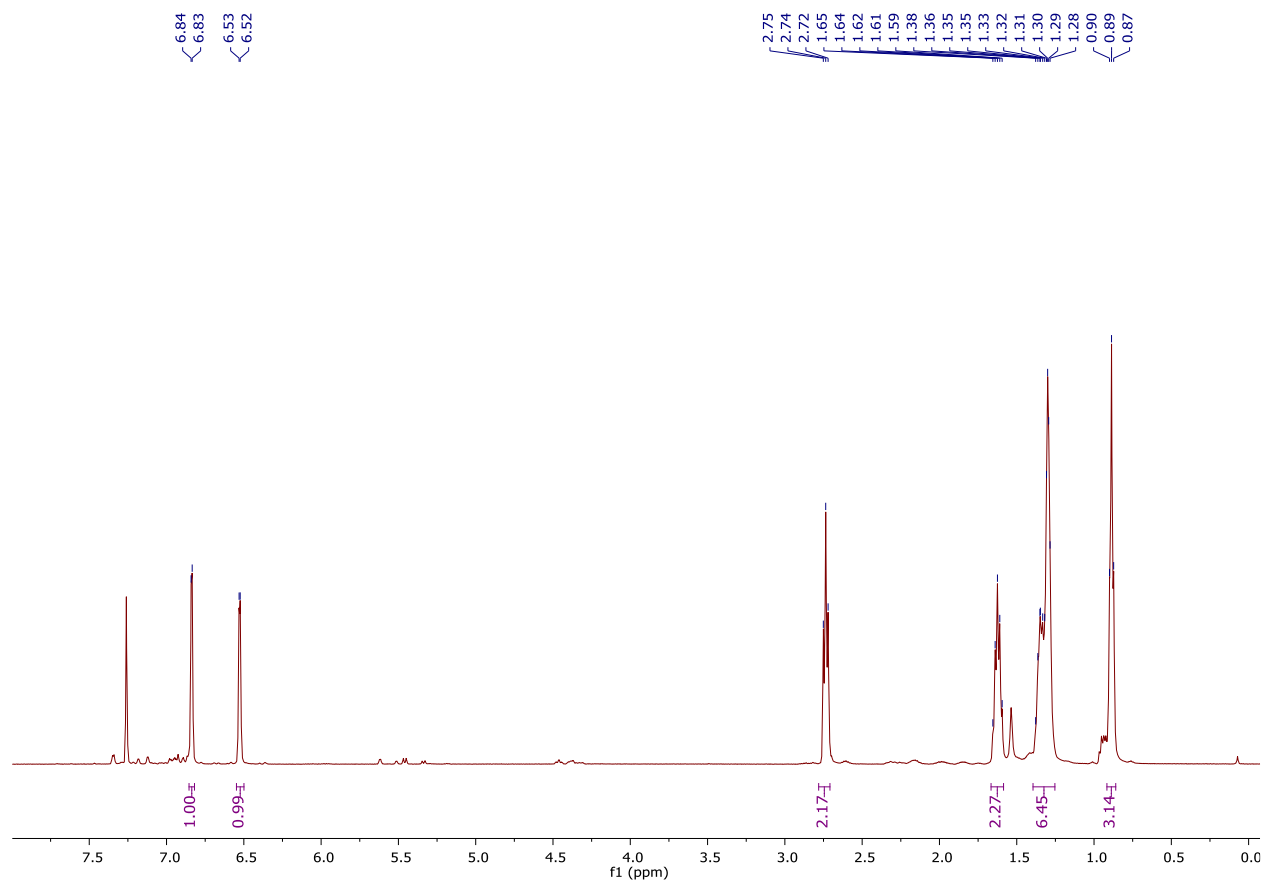

**Figure S1.**  $^1\text{H}$  NMR Spectrum of compound **2** (CDCl<sub>3</sub>, 500 Hz)

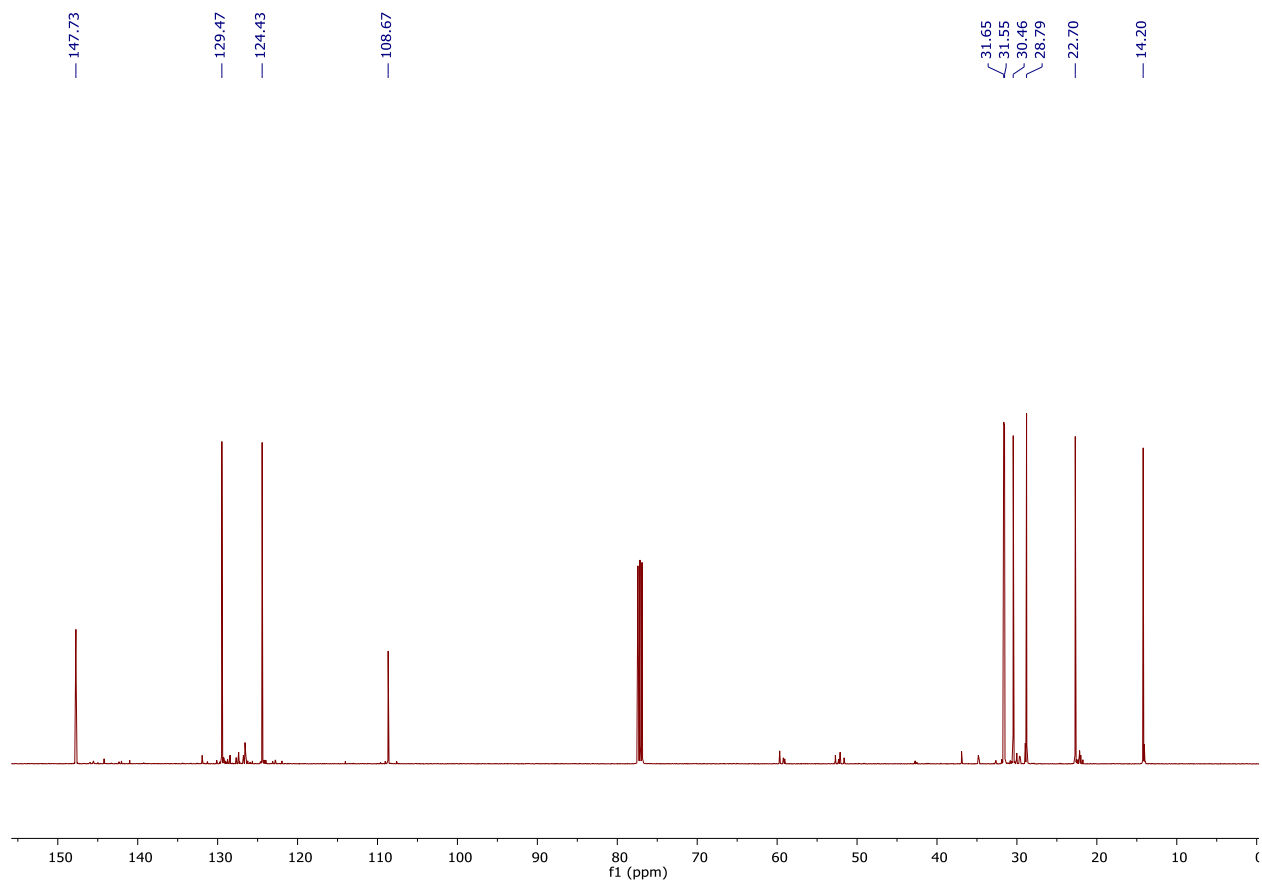

**Figure S2.**  $^{13}\text{C}$  NMR spectrum of compound **2** ( $\text{CDCl}_3$ , 500 Hz)

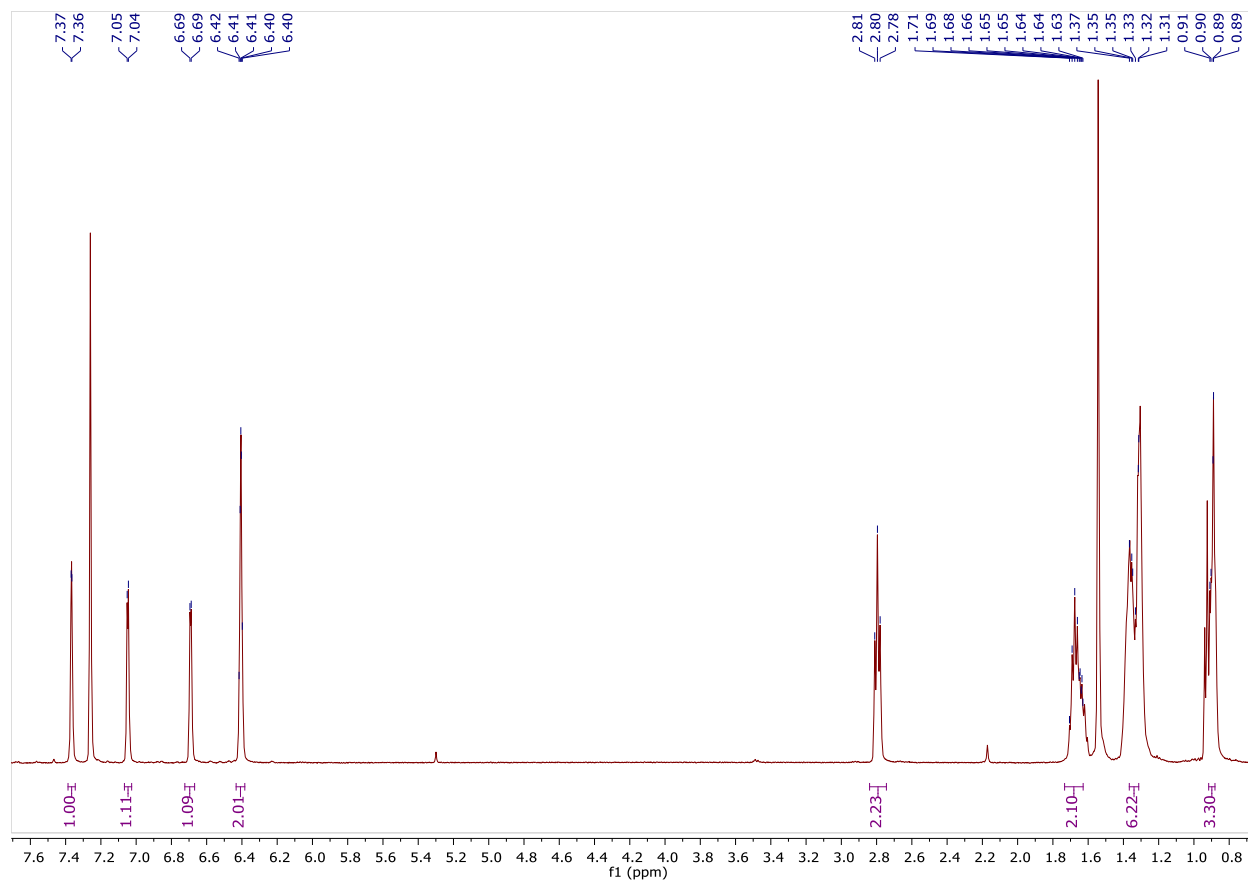

**Figure S3.** <sup>1</sup>H NMR spectrum of compound **3** (CDCl<sub>3</sub>, 500 Hz)

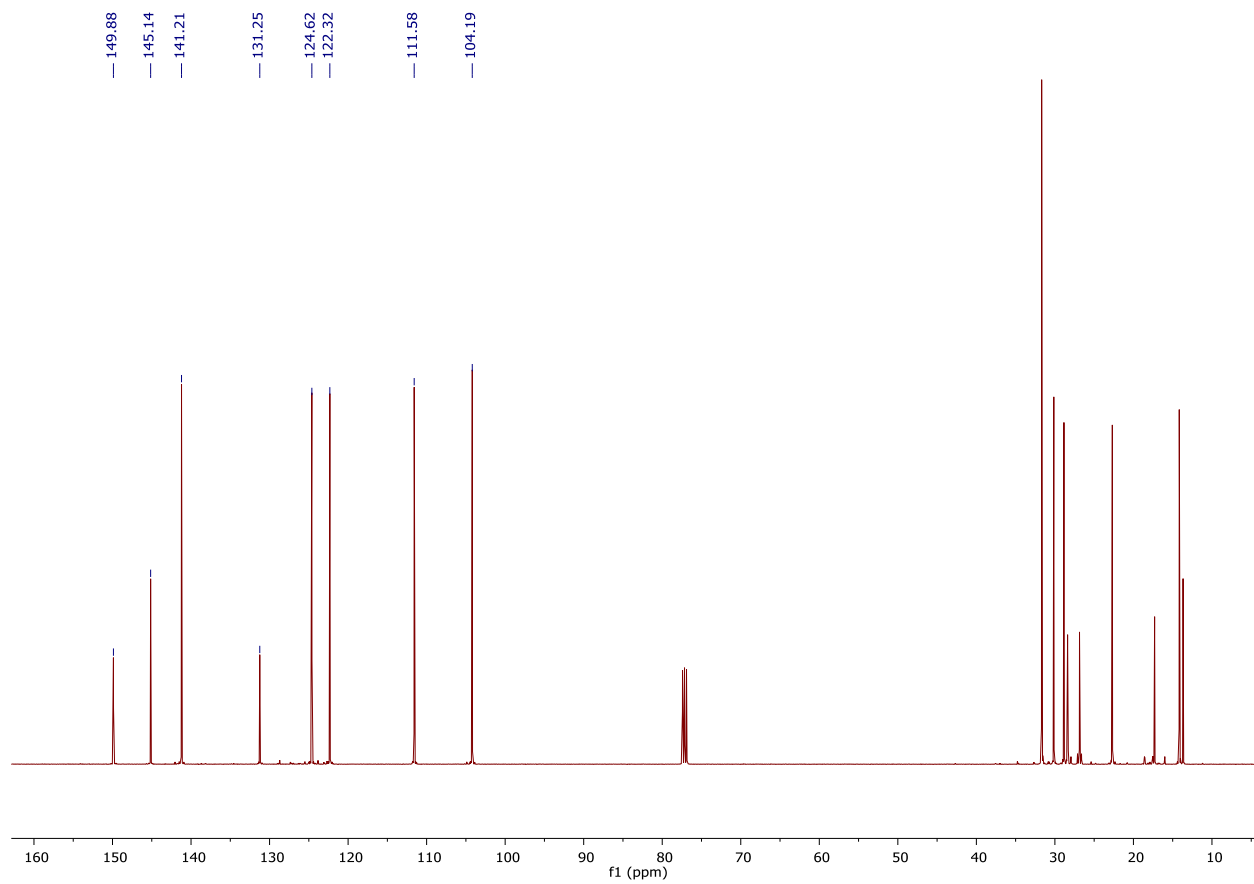

**Figure S4.**  $^{13}\text{C}$  NMR spectrum of compound **3** ( $\text{CDCl}_3$ , 500 Hz)



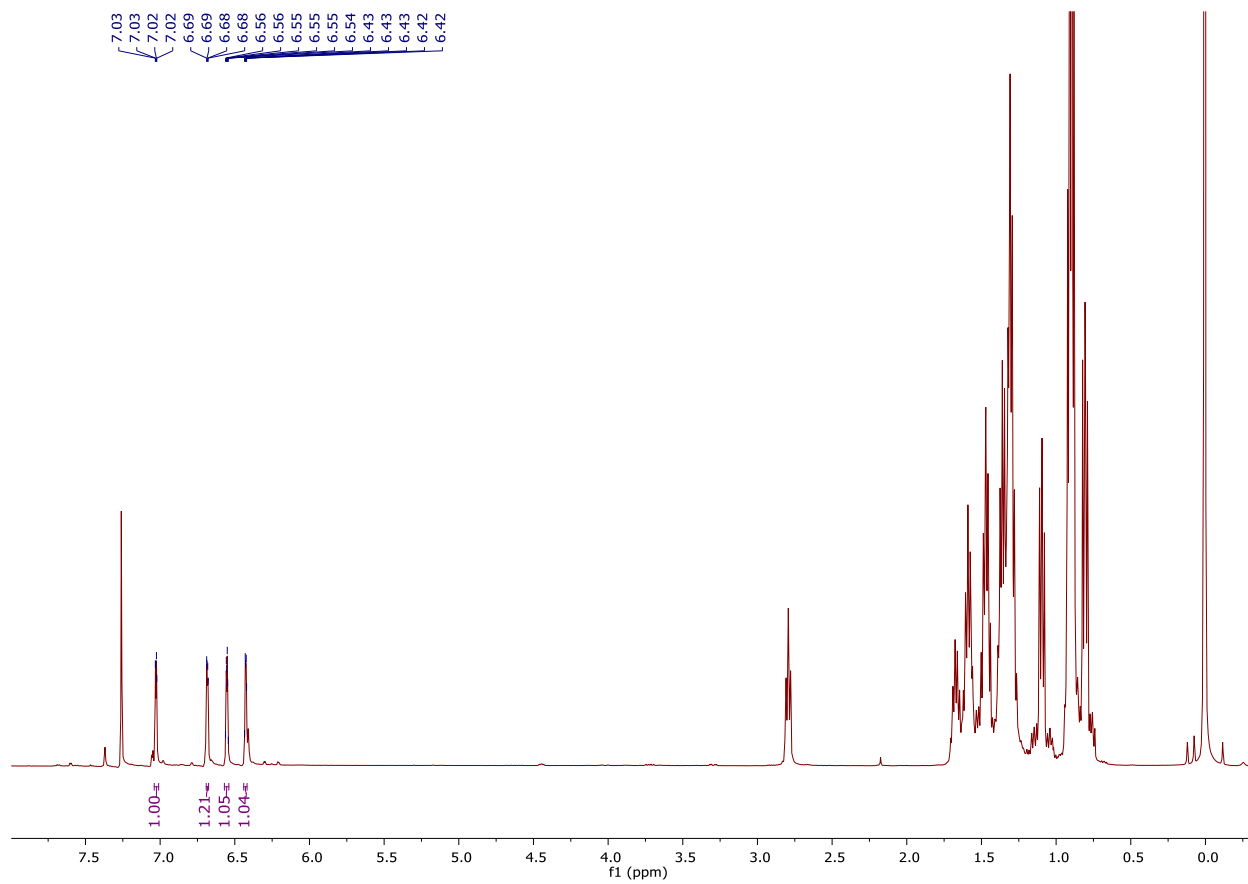

**Figure S5.**  $^1\text{H}$  NMR spectrum of compound **4** ( $\text{CDCl}_3$ , 500 Hz)

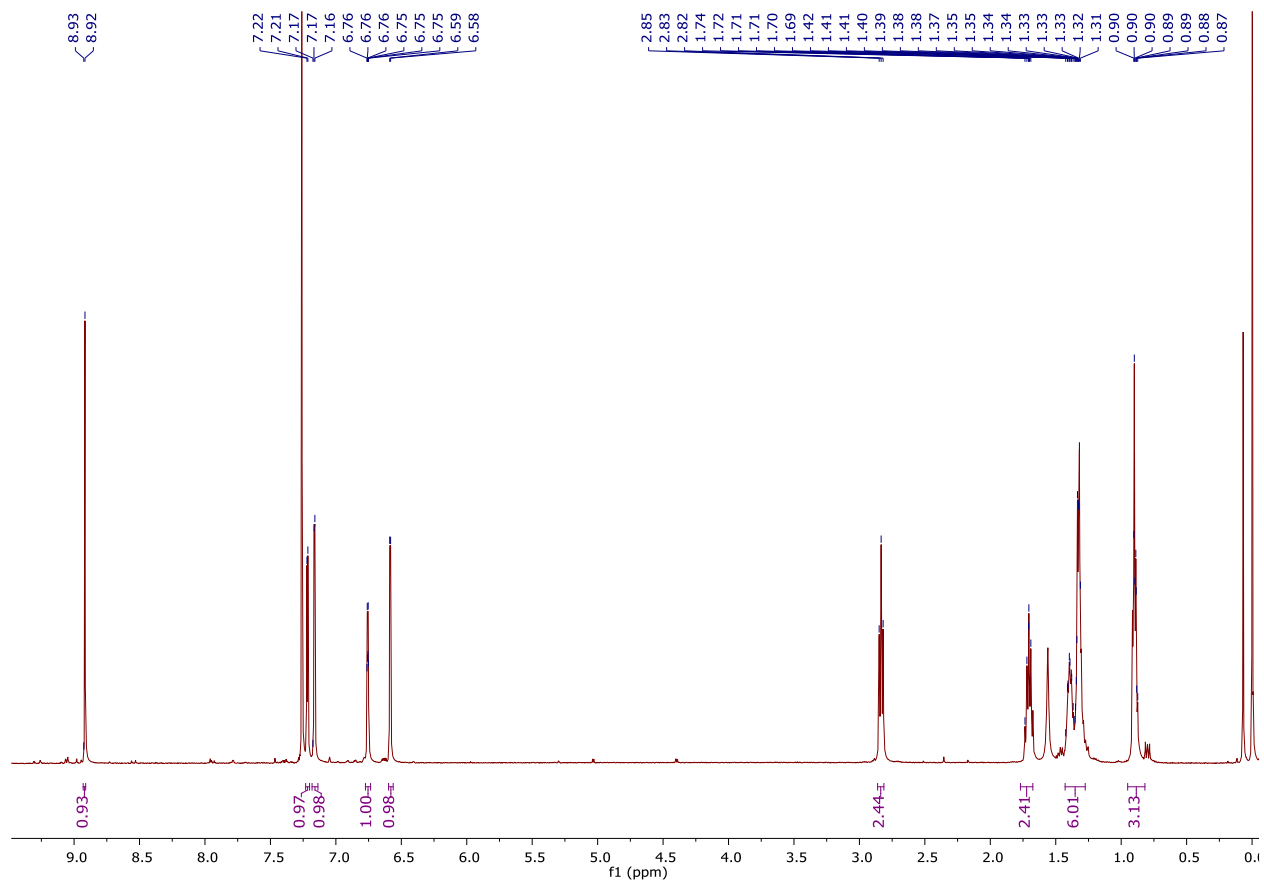

**Figure S6.**  $^1\text{H}$  NMR spectrum of compound **Pyrz(FT)<sub>2</sub>** ( $\text{CDCl}_3$ , 500 Hz)

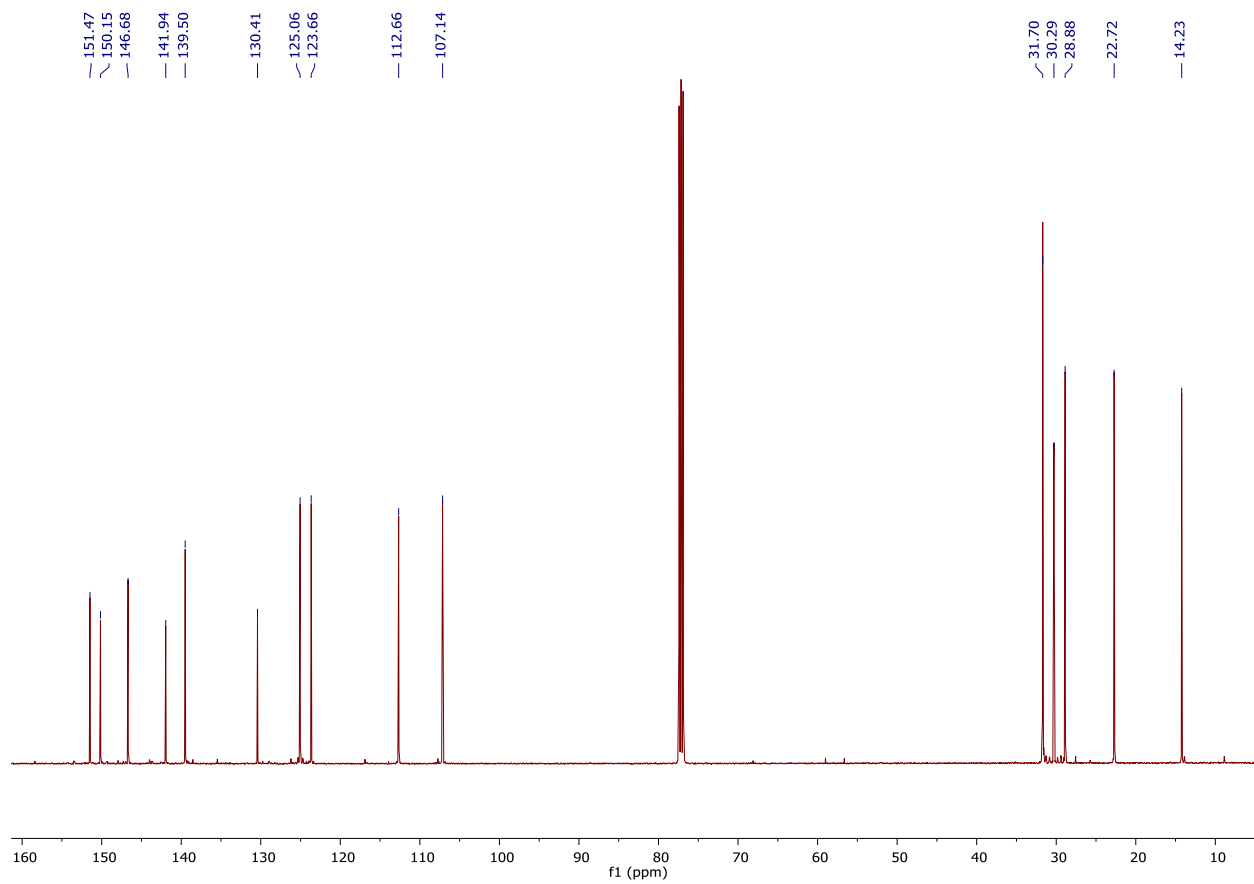

**Figure S7.**  $^{13}\text{C}$  NMR spectrum of compound **Pyrz(FT) $_2$**  ( $\text{CDCl}_3$ , 500 Hz)

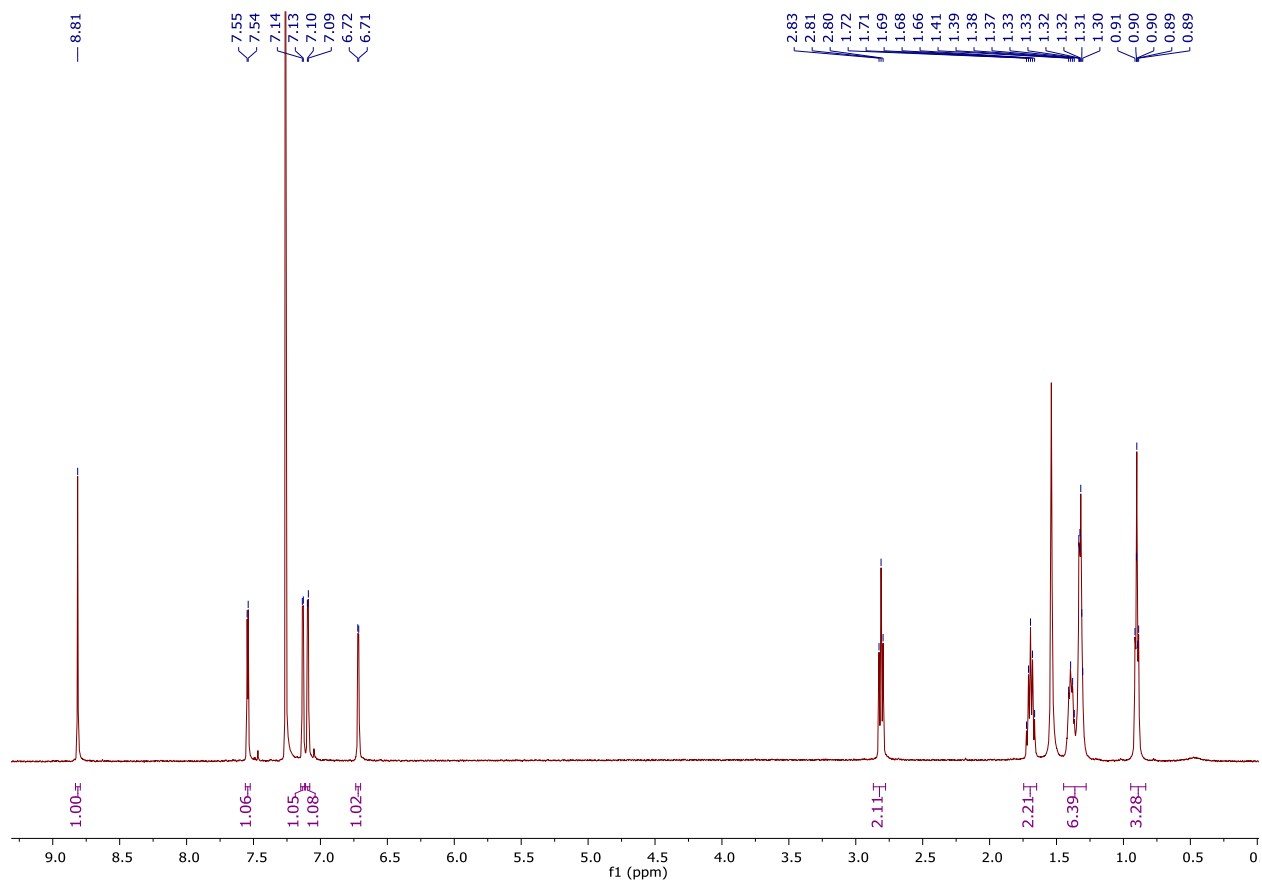

**Figure S8.**  $^1\text{H}$  NMR spectrum of compound **Pyrz(TT)<sub>2</sub>** ( $\text{CDCl}_3$ , 500 Hz)

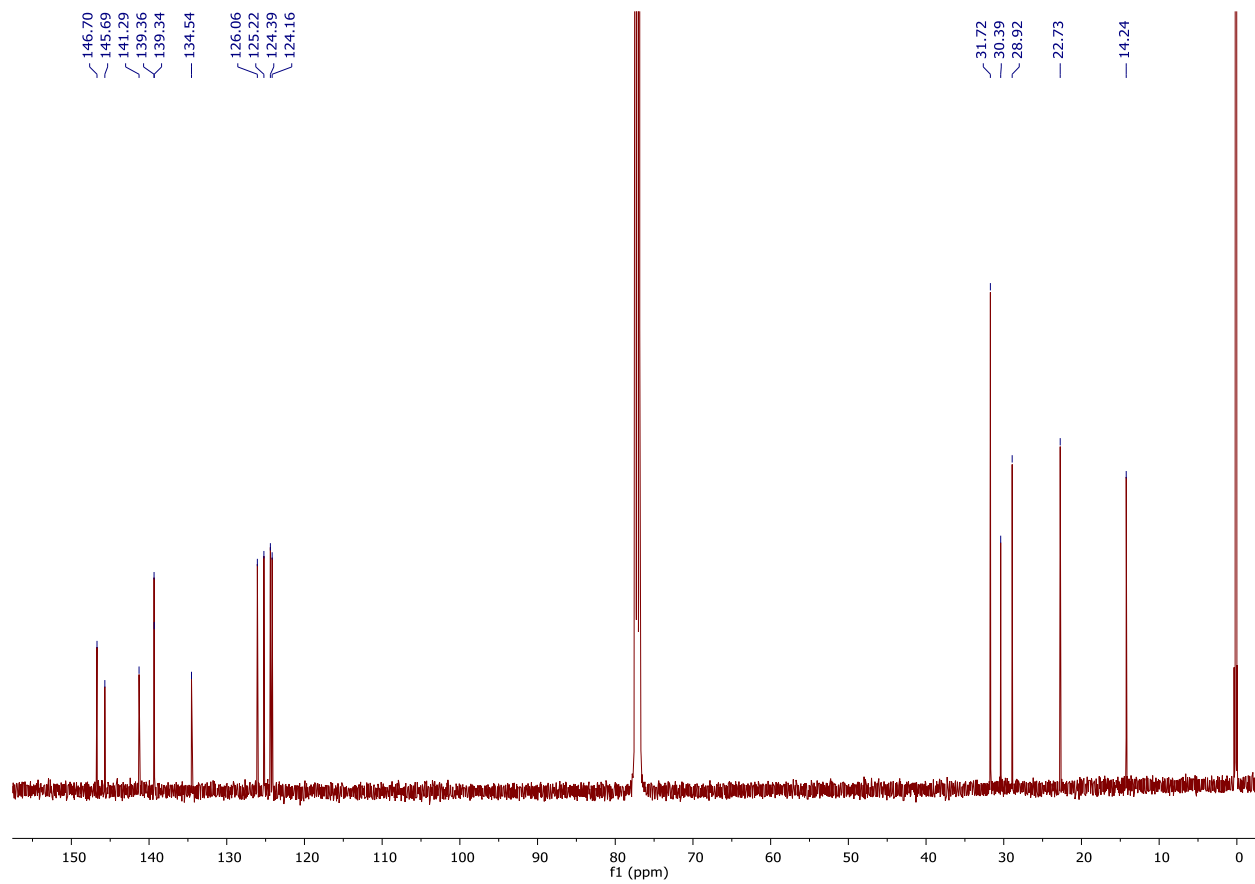

**Figure S9.**  $^{13}\text{C}$  NMR spectrum of compound **Pyrz(TT)<sub>2</sub>** ( $\text{CDCl}_3$ , 500 Hz)

Figure 1

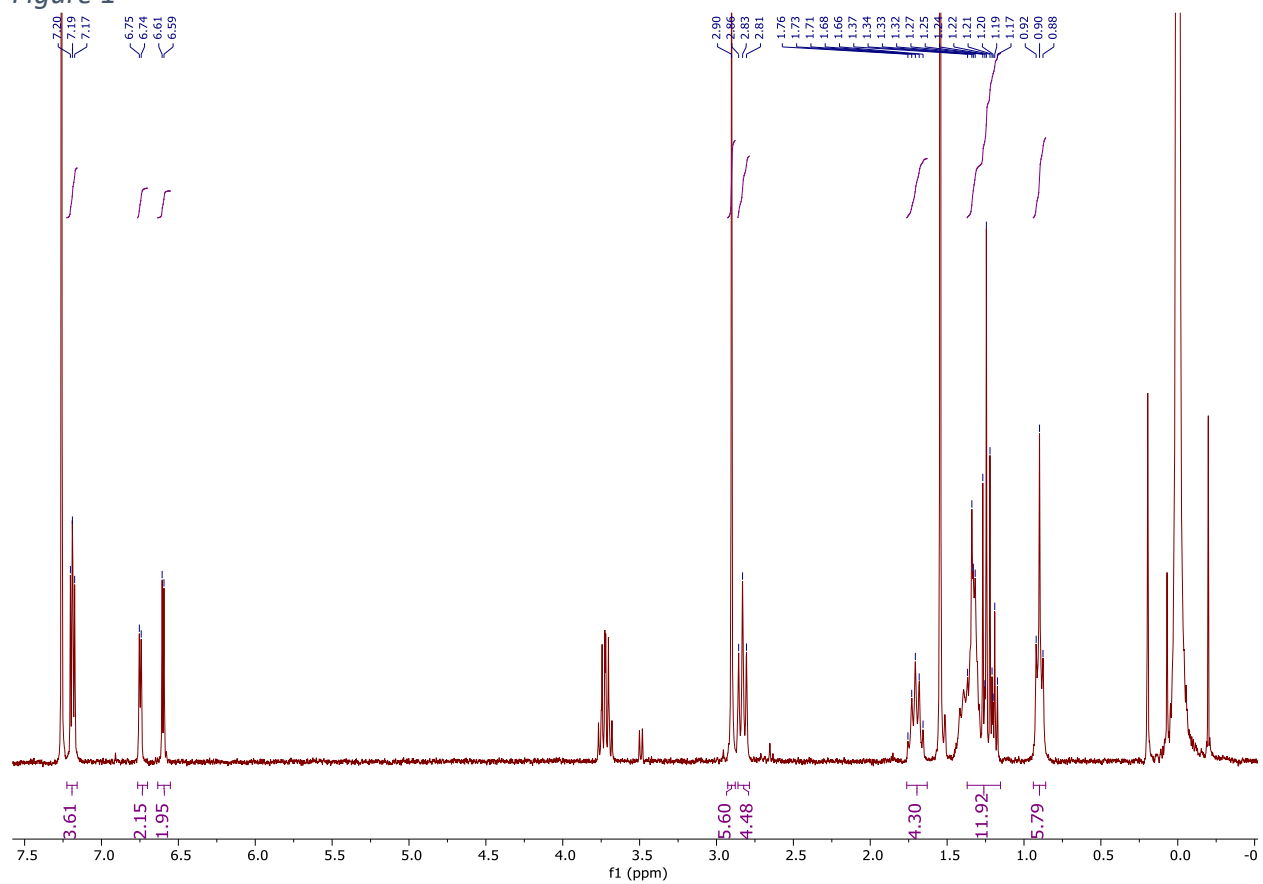

Figure S10. <sup>1</sup>H NMR spectrum of compound MePyrz(FT)<sub>2</sub> (CDCl<sub>3</sub>, 300 Hz)

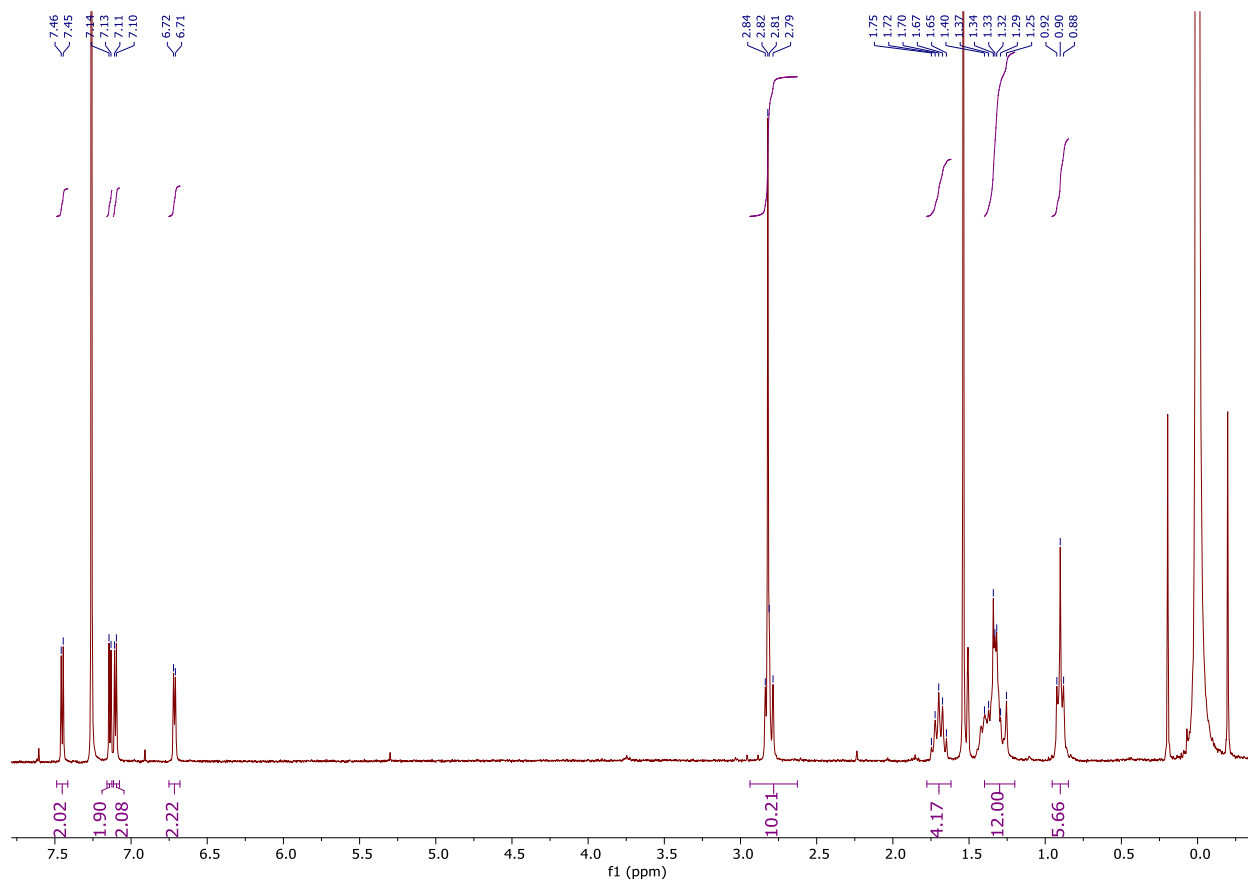

**Figure S11.**  $^1\text{H}$  NMR spectrum of compound **MePyrz(TT)<sub>2</sub>** ( $\text{CDCl}_3$ , 300 Hz)

## Cyclic voltammogram

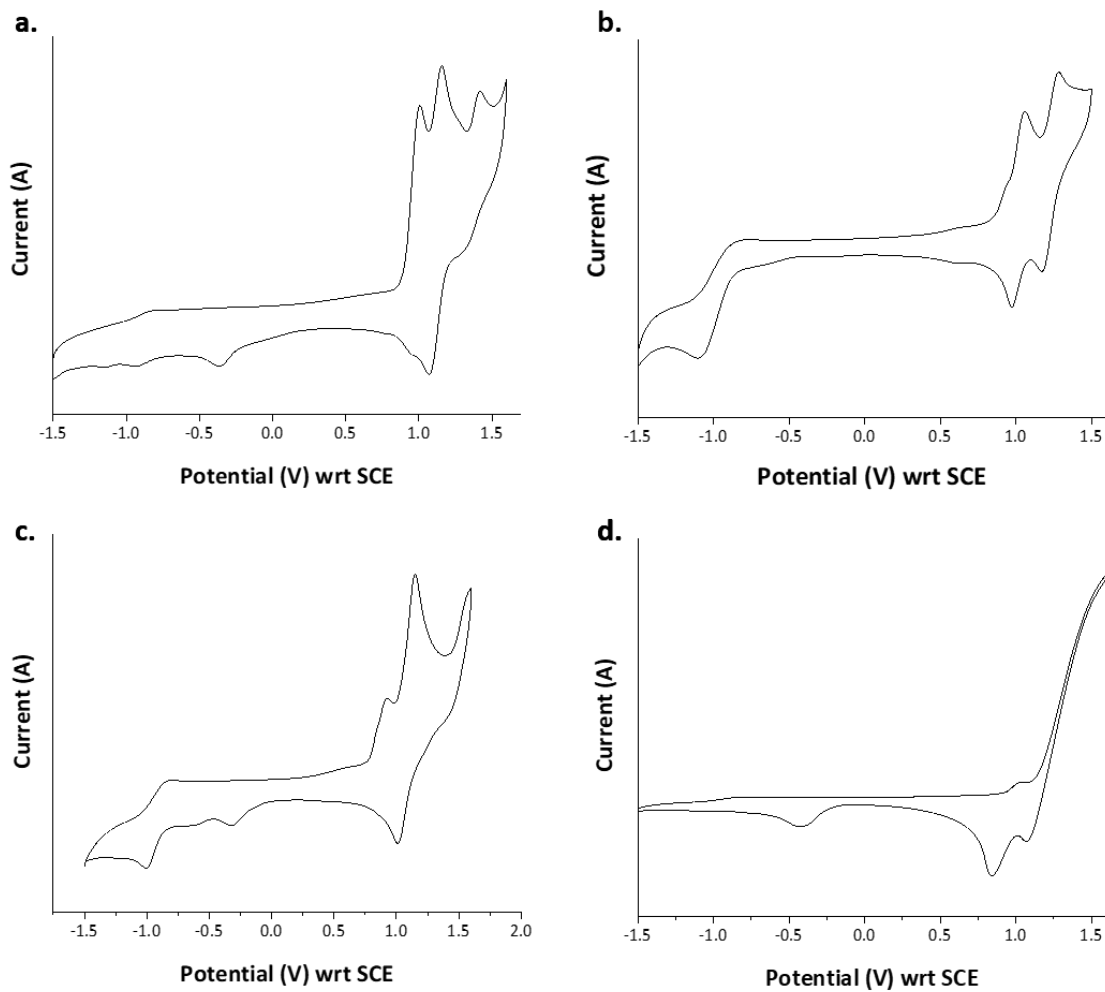

**Figure S12.** Cyclic voltammograms of 1 mM (a) **Pyrz(FT)<sub>2</sub>** (b) **Pyrz(TT)<sub>2</sub>** (c) **MePyrz(FT)<sub>2</sub>** (d) **MePyrz(TT)<sub>2</sub>** in DCM with 0.10 mol dm<sup>-3</sup> tetrabutylammonium hexafluorophosphate (Bu<sub>4</sub>N<sup>+</sup>PF<sub>6</sub><sup>-</sup>) as the background electrolyte.



## Computational Details and Results

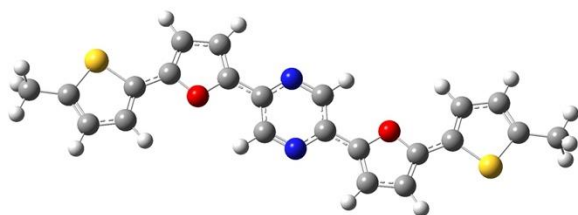

Figure S13. Optimized  $S_0$  geometry of Pyr $z$ (FT) $_2$  with  $C_{2h}$  symmetry.

Table S1. Cartesian coordinates (in Å) of the B3LYP/6-311G(2df, 2pd) optimized  $S_0$  geometry of Pyr $z$ (FT) $_2$  with  $C_{2h}$  symmetry.

|   |           |          |           |
|---|-----------|----------|-----------|
| C | 4.468210  | 0.000000 | 6.005278  |
| C | 3.128811  | 0.000000 | 6.301424  |
| S | 2.892154  | 0.000000 | 8.028854  |
| C | 4.603991  | 0.000000 | 8.333787  |
| C | 5.293989  | 0.000000 | 7.156000  |
| C | 2.016765  | 0.000000 | 5.394455  |
| O | 2.305293  | 0.000000 | 4.060545  |
| C | 1.117090  | 0.000000 | 3.380132  |
| C | 0.080822  | 0.000000 | 4.272024  |
| C | 0.656052  | 0.000000 | 5.564451  |
| C | 1.159265  | 0.000000 | 1.938011  |
| N | -0.018589 | 0.000000 | 1.289859  |
| C | 0.013397  | 0.000000 | -0.030084 |
| C | 1.217594  | 0.000000 | -0.754123 |
| N | 2.395448  | 0.000000 | -0.105971 |
| C | 2.363462  | 0.000000 | 1.213973  |
| C | 1.259769  | 0.000000 | -2.196243 |
| O | 0.071566  | 0.000000 | -2.876656 |
| C | 0.360094  | 0.000000 | -4.210567 |
| C | 1.720807  | 0.000000 | -4.380563 |
| C | 2.296037  | 0.000000 | -3.088136 |
| C | -0.751952 | 0.000000 | -5.117535 |
| S | -0.515296 | 0.000000 | -6.844966 |
| C | -2.227132 | 0.000000 | -7.149899 |
| C | -2.917130 | 0.000000 | -5.972112 |
| C | -2.091351 | 0.000000 | -4.821390 |
| H | 2.240102  | 0.000000 | -5.323282 |
| H | 0.136757  | 0.000000 | 6.507171  |

|   |           |           |           |
|---|-----------|-----------|-----------|
| H | -2.462614 | 0.000000  | -3.808354 |
| H | 4.839473  | 0.000000  | 4.992242  |
| C | -2.765641 | 0.000000  | -8.543833 |
| C | 5.142500  | 0.000000  | 9.727721  |
| H | -3.997178 | 0.000000  | -5.932122 |
| H | 6.374037  | 0.000000  | 7.116010  |
| H | 3.338391  | 0.000000  | -2.825143 |
| H | -0.961532 | 0.000000  | 4.009031  |
| H | 3.314112  | 0.000000  | 1.731596  |
| H | -0.937253 | 0.000000  | -0.547708 |
| H | 6.231426  | 0.000000  | 9.701458  |
| H | -3.854567 | 0.000000  | -8.517569 |
| H | 4.821404  | 0.879507  | 10.289389 |
| H | 4.821404  | -0.879507 | 10.289389 |
| H | -2.444545 | 0.879507  | -9.105500 |
| H | -2.444545 | -0.879507 | -9.105500 |

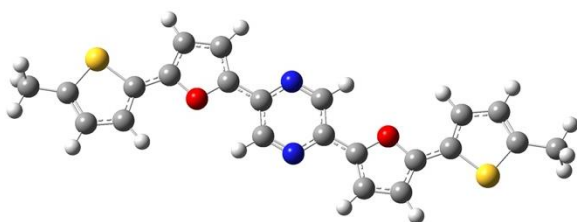

**Figure S14.** Optimized  $S_1$  geometry of Pyr $z$ (FT) $_2$  with  $C_{2h}$  symmetry.

**Table S2.** Cartesian coordinates (in Å) of the B3LYP/6-311G(2df, 2pd) optimized  $S_1$  geometry of Pyr $z$ (FT) $_2$  with  $C_{2h}$  symmetry.

|   |           |          |           |
|---|-----------|----------|-----------|
| C | 4.490919  | 0.000000 | 6.008848  |
| C | 3.133187  | 0.000000 | 6.293430  |
| S | 2.882337  | 0.000000 | 8.027943  |
| C | 4.593605  | 0.000000 | 8.340529  |
| C | 5.296263  | 0.000000 | 7.161380  |
| C | 2.051199  | 0.000000 | 5.385463  |
| O | 2.351628  | 0.000000 | 4.045060  |
| C | 1.165993  | 0.000000 | 3.355384  |
| C | 0.109881  | 0.000000 | 4.261792  |
| C | 0.671512  | 0.000000 | 5.538947  |
| C | 1.185876  | 0.000000 | 1.938473  |
| N | -0.035048 | 0.000000 | 1.308298  |
| C | -0.006592 | 0.000000 | -0.002144 |
| C | 1.190983  | 0.000000 | -0.754584 |
| N | 2.411907  | 0.000000 | -0.124409 |
| C | 2.383451  | 0.000000 | 1.186033  |
| C | 1.210866  | 0.000000 | -2.171495 |
| O | 0.025231  | 0.000000 | -2.861171 |
| C | 0.325660  | 0.000000 | -4.201575 |
| C | 1.705346  | 0.000000 | -4.355059 |
| C | 2.266978  | 0.000000 | -3.077903 |
| C | -0.756328 | 0.000000 | -5.109541 |
| S | -0.505478 | 0.000000 | -6.844055 |
| C | -2.216746 | 0.000000 | -7.156640 |
| C | -2.919404 | 0.000000 | -5.977492 |
| C | -2.114060 | 0.000000 | -4.824960 |
| H | 2.227717  | 0.000000 | -5.296647 |
| H | 0.149142  | 0.000000 | 6.480536  |
| H | -2.492080 | 0.000000 | -3.814722 |
| H | 4.868939  | 0.000000 | 4.998610  |
| C | -2.747432 | 0.000000 | -8.550449 |

|   |           |           |           |
|---|-----------|-----------|-----------|
| C | 5.124291  | 0.000000  | 9.734337  |
| H | -4.000073 | 0.000000  | -5.951412 |
| H | 6.376932  | 0.000000  | 7.135301  |
| H | 3.305565  | 0.000000  | -2.801588 |
| H | -0.928707 | 0.000000  | 3.985477  |
| H | 3.337342  | 0.000000  | 1.701202  |
| H | -0.960483 | 0.000000  | -0.517314 |
| H | 6.213350  | 0.000000  | 9.715899  |
| H | -3.836492 | 0.000000  | -8.532011 |
| H | 4.798105  | 0.878926  | 10.295927 |
| H | 4.798105  | -0.878926 | 10.295927 |
| H | -2.421246 | 0.878926  | -9.112038 |
| H | -2.421246 | -0.878926 | -9.112038 |

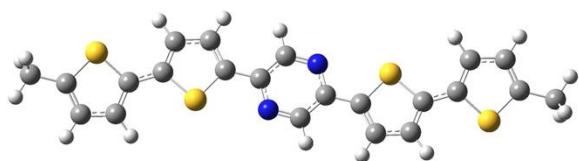

**Figure S15. Optimized  $S_0$  geometry of Pyrz(TT) $_2$  with  $C_i$  symmetry.**

**Table S3. Cartesian coordinates (in Å) of the B3LYP/6-311G(2df, 2pd) optimized  $S_0$  geometry of Pyrz(TT) $_2$  with  $C_i$  symmetry.**

|   |           |            |           |
|---|-----------|------------|-----------|
| S | -1.001267 | -7.948031  | -0.087761 |
| C | 0.102680  | -6.596784  | 0.014944  |
| C | 1.393571  | -7.057035  | 0.078762  |
| C | 1.494313  | -8.469289  | 0.052903  |
| C | 0.290598  | -9.107855  | -0.029666 |
| C | -0.380104 | -5.236924  | 0.019792  |
| S | 0.694209  | -3.902043  | -0.289524 |
| C | -0.591363 | -2.744016  | -0.092780 |
| C | -1.778280 | -3.382156  | 0.182439  |
| C | -1.660915 | -4.782755  | 0.246493  |
| C | -0.308534 | -1.330122  | -0.231937 |
| N | 0.958817  | -0.971942  | -0.503809 |
| C | 1.229418  | 0.312871   | -0.634709 |
| C | 0.248095  | 1.308671   | -0.501108 |
| N | -1.019256 | 0.950491   | -0.229236 |
| C | -1.289857 | -0.334322  | -0.098336 |
| C | 0.530924  | 2.722565   | -0.640265 |
| S | -0.754648 | 3.880592   | -0.443521 |
| C | 0.319665  | 5.215473   | -0.752837 |
| C | 1.600476  | 4.761304   | -0.979538 |
| C | 1.717841  | 3.360705   | -0.915484 |
| C | -0.163119 | 6.575333   | -0.747989 |
| C | -1.454010 | 7.035584   | -0.811807 |
| C | -1.554752 | 8.447838   | -0.785948 |
| C | -0.351037 | 9.086404   | -0.703378 |
| S | 0.940828  | 7.926580   | -0.645284 |
| C | -0.079919 | 10.555486  | -0.661658 |
| C | 0.019480  | -10.576937 | -0.071387 |
| H | 2.426629  | 5.420044   | -1.203452 |
| H | -2.487068 | -5.441495  | 0.470408  |

|   |           |            |           |
|---|-----------|------------|-----------|
| H | -2.306392 | 6.376914   | -0.892658 |
| H | 2.245953  | -6.398365  | 0.159613  |
| H | -2.493836 | 8.980722   | -0.833435 |
| H | 2.433397  | -9.002173  | 0.100390  |
| H | 2.649698  | 2.839397   | -1.075560 |
| H | -2.710137 | -2.860848  | 0.342515  |
| H | -2.319135 | -0.592035  | 0.119855  |
| H | 2.258696  | 0.570584   | -0.852900 |
| H | -1.020076 | 11.104644  | -0.694771 |
| H | 0.959637  | -11.126095 | -0.038274 |
| H | 0.446383  | 10.847747  | 0.249171  |
| H | 0.528405  | 10.882055  | -1.507487 |
| H | -0.588844 | -10.903505 | 0.774442  |
| H | -0.506822 | -10.869198 | -0.982216 |

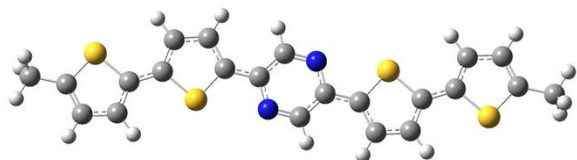

**Figure S16. Optimized S<sub>1</sub> geometry of Pyrzo(TT)<sub>2</sub> with C<sub>2h</sub> symmetry.**

**Table S4. Cartesian coordinates (in Å) of the B3LYP/6-311G(2df, 2pd) optimized S<sub>1</sub> geometry of Pyrzo(TT)<sub>2</sub> with C<sub>2h</sub> symmetry.**

|   |           |            |          |
|---|-----------|------------|----------|
| S | -0.975810 | -7.925900  | 0.000000 |
| C | 0.126135  | -6.555742  | 0.000000 |
| C | 1.434716  | -7.016702  | 0.000000 |
| C | 1.538051  | -8.418701  | 0.000000 |
| C | 0.330370  | -9.071019  | 0.000000 |
| C | -0.349939 | -5.219064  | 0.000000 |
| S | 0.753621  | -3.857566  | 0.000000 |
| C | -0.575538 | -2.716268  | 0.000000 |
| C | -1.802303 | -3.390734  | 0.000000 |
| C | -1.674265 | -4.771653  | 0.000000 |
| C | -0.290563 | -1.325936  | 0.000000 |
| N | 1.028550  | -0.956544  | 0.000000 |
| C | 1.292768  | 0.325872   | 0.000000 |
| C | 0.290563  | 1.325936   | 0.000000 |
| N | -1.028550 | 0.956544   | 0.000000 |
| C | -1.292768 | -0.325872  | 0.000000 |
| C | 0.575538  | 2.716268   | 0.000000 |
| S | -0.753621 | 3.857566   | 0.000000 |
| C | 0.349939  | 5.219064   | 0.000000 |
| C | 1.674265  | 4.771653   | 0.000000 |
| C | 1.802303  | 3.390734   | 0.000000 |
| C | -0.126135 | 6.555742   | 0.000000 |
| C | -1.434716 | 7.016702   | 0.000000 |
| C | -1.538051 | 8.418701   | 0.000000 |
| C | -0.330370 | 9.071019   | 0.000000 |
| S | 0.975810  | 7.925900   | 0.000000 |
| C | -0.074190 | 10.540415  | 0.000000 |
| C | 0.074190  | -10.540415 | 0.000000 |
| H | 2.516074  | 5.448932   | 0.000000 |
| H | -2.516074 | -5.448932  | 0.000000 |

|   |           |            |           |
|---|-----------|------------|-----------|
| H | -2.285606 | 6.351621   | 0.000000  |
| H | 2.285606  | -6.351621  | 0.000000  |
| H | -2.480111 | 8.948784   | 0.000000  |
| H | 2.480111  | -8.948784  | 0.000000  |
| H | 2.753589  | 2.881078   | 0.000000  |
| H | -2.753589 | -2.881078  | 0.000000  |
| H | -2.340812 | -0.605364  | 0.000000  |
| H | 2.340812  | 0.605364   | 0.000000  |
| H | -1.019474 | 11.081596  | 0.000000  |
| H | 1.019474  | -11.081596 | 0.000000  |
| H | 0.493458  | 10.855882  | 0.878852  |
| H | 0.493458  | 10.855882  | -0.878852 |
| H | -0.493458 | -10.855882 | 0.878852  |
| H | -0.493458 | -10.855882 | -0.878852 |



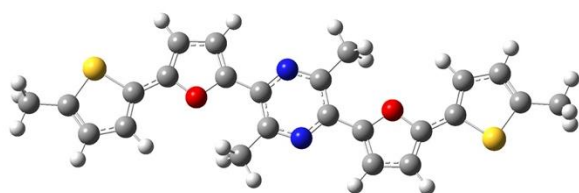

Figure S17. Optimized  $S_0$  geometry of MePyrz(FT) $_2$  with  $C_{2h}$  symmetry.

Table S5. Cartesian coordinates (in Å) of the B3LYP/6-311G(2df, 2pd) optimized  $S_0$  geometry of MePyrz(FT) $_2$  with  $C_{2h}$  symmetry.

|   |           |          |           |
|---|-----------|----------|-----------|
| C | 4.512756  | 0.000000 | 6.112630  |
| C | 3.165147  | 0.000000 | 6.370100  |
| S | 2.879672  | 0.000000 | 8.090402  |
| C | 4.582458  | 0.000000 | 8.444365  |
| C | 5.305428  | 0.000000 | 7.286823  |
| C | 2.078541  | 0.000000 | 5.433002  |
| O | 2.404640  | 0.000000 | 4.108331  |
| C | 1.238384  | 0.000000 | 3.389566  |
| C | 0.177589  | 0.000000 | 4.256366  |
| C | 0.713690  | 0.000000 | 5.563444  |
| C | 1.271830  | 0.000000 | 1.941039  |
| N | 0.060235  | 0.000000 | 1.364494  |
| C | -0.060660 | 0.000000 | 0.046100  |
| C | 1.105029  | 0.000000 | -0.757151 |
| N | 2.316624  | 0.000000 | -0.180606 |
| C | 2.437519  | 0.000000 | 1.137789  |
| C | 1.138475  | 0.000000 | -2.205677 |
| O | -0.027781 | 0.000000 | -2.924443 |
| C | 0.298318  | 0.000000 | -4.249114 |
| C | 1.663169  | 0.000000 | -4.379556 |
| C | 2.199270  | 0.000000 | -3.072478 |
| C | -0.788288 | 0.000000 | -5.186212 |
| S | -0.502813 | 0.000000 | -6.906514 |
| C | -2.205599 | 0.000000 | -7.260477 |
| C | -2.928569 | 0.000000 | -6.102935 |
| C | -2.135897 | 0.000000 | -4.928742 |
| H | 2.209989  | 0.000000 | -5.306685 |
| H | 0.166870  | 0.000000 | 6.490574  |
| H | -2.536554 | 0.000000 | -3.926978 |
| H | 4.913413  | 0.000000 | 5.110867  |
| C | -2.703852 | 0.000000 | -8.669297 |

|   |           |           |           |
|---|-----------|-----------|-----------|
| C | 5.080711  | 0.000000  | 9.853186  |
| H | -4.009370 | 0.000000  | -6.093735 |
| H | 6.386229  | 0.000000  | 7.277623  |
| H | 3.233129  | 0.000000  | -2.779943 |
| H | -0.856270 | 0.000000  | 3.963832  |
| H | 6.169976  | 0.000000  | 9.858197  |
| H | -3.793117 | 0.000000  | -8.674309 |
| H | 4.743741  | 0.879499  | 10.405560 |
| H | 4.743741  | -0.879499 | 10.405560 |
| H | -2.366882 | 0.879499  | -9.221671 |
| H | -2.366882 | -0.879499 | -9.221671 |
| C | 3.842301  | 0.000000  | 1.674024  |
| H | 4.033011  | 0.874830  | 2.296070  |
| H | 4.033011  | -0.874830 | 2.296070  |
| H | 4.531038  | 0.000000  | 0.833441  |
| C | -1.465442 | 0.000000  | -0.490136 |
| H | -1.656152 | 0.874830  | -1.112182 |
| H | -1.656152 | -0.874830 | -1.112182 |
| H | -2.154179 | 0.000000  | 0.350448  |

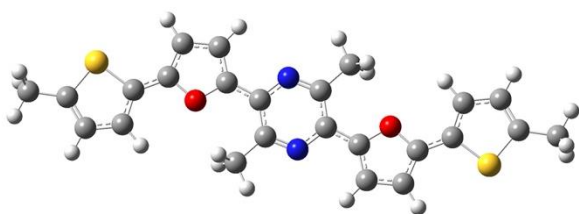

**Figure S18. Optimized S<sub>1</sub> geometry of MePyrz(FT)<sub>2</sub> with C<sub>2h</sub> symmetry.**

**Table S6. Cartesian coordinates (in Å) of the B3LYP/6-311G(2df, 2pd) optimized S<sub>1</sub> geometry of MePyrz(FT)<sub>2</sub> with C<sub>2h</sub> symmetry.**

|   |           |          |           |
|---|-----------|----------|-----------|
| C | 4.532556  | 0.000000 | 6.115602  |
| C | 3.166883  | 0.000000 | 6.359640  |
| S | 2.865556  | 0.000000 | 8.086522  |
| C | 4.567350  | 0.000000 | 8.449635  |
| C | 5.303785  | 0.000000 | 7.291792  |
| C | 2.110472  | 0.000000 | 5.422184  |
| O | 2.448182  | 0.000000 | 4.090627  |
| C | 1.284487  | 0.000000 | 3.362925  |
| C | 0.203532  | 0.000000 | 4.245559  |
| C | 0.727193  | 0.000000 | 5.536283  |
| C | 1.296987  | 0.000000 | 1.942706  |
| N | 0.045832  | 0.000000 | 1.382956  |
| C | -0.078864 | 0.000000 | 0.076364  |
| C | 1.079872  | 0.000000 | -0.758818 |
| N | 2.331027  | 0.000000 | -0.199068 |
| C | 2.455723  | 0.000000 | 1.107525  |
| C | 1.092372  | 0.000000 | -2.179037 |
| O | -0.071323 | 0.000000 | -2.906739 |
| C | 0.266387  | 0.000000 | -4.238296 |
| C | 1.649666  | 0.000000 | -4.352395 |
| C | 2.173327  | 0.000000 | -3.061671 |
| C | -0.790024 | 0.000000 | -5.175751 |
| S | -0.488697 | 0.000000 | -6.902634 |
| C | -2.190491 | 0.000000 | -7.265746 |
| C | -2.926926 | 0.000000 | -6.107904 |
| C | -2.155697 | 0.000000 | -4.931713 |
| H | 2.199110  | 0.000000 | -5.278486 |
| H | 0.177749  | 0.000000 | 6.462375  |
| H | -2.564320 | 0.000000 | -3.933412 |
| H | 4.941179  | 0.000000 | 5.117301  |
| C | -2.679564 | 0.000000 | -8.674775 |

|   |           |           |           |
|---|-----------|-----------|-----------|
| C | 5.056423  | 0.000000  | 9.858663  |
| H | -4.007966 | 0.000000  | -6.113406 |
| H | 6.384825  | 0.000000  | 7.297295  |
| H | 3.203294  | 0.000000  | -2.756815 |
| H | -0.826435 | 0.000000  | 3.940703  |
| H | 6.145610  | 0.000000  | 9.872426  |
| H | -3.768751 | 0.000000  | -8.688537 |
| H | 4.714059  | 0.878942  | 10.410617 |
| H | 4.714059  | -0.878942 | 10.410617 |
| H | -2.337200 | 0.878942  | -9.226729 |
| H | -2.337200 | -0.878942 | -9.226729 |
| C | 3.862613  | 0.000000  | 1.638659  |
| H | 4.054294  | 0.874950  | 2.260758  |
| H | 4.054294  | -0.874950 | 2.260758  |
| H | 4.547959  | 0.000000  | 0.795260  |
| C | -1.485754 | 0.000000  | -0.454770 |
| H | -1.677435 | 0.874950  | -1.076870 |
| H | -1.677435 | -0.874950 | -1.076870 |
| H | -2.171100 | -0.000000 | 0.388628  |

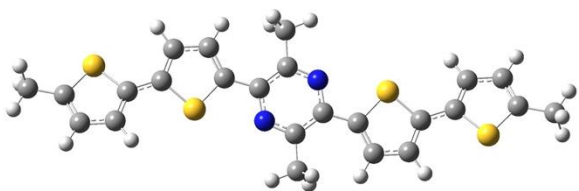

Figure S19. Optimized  $S_0$  geometry of MePyrz(TT)<sub>2</sub> with  $C_i$  symmetry.

Table S7. Cartesian coordinates (in Å) of the B3LYP/6-311G(2df, 2pd) optimized  $S_0$  geometry of MePyrz(TT)<sub>2</sub> with  $C_i$  symmetry.

|   |           |            |           |
|---|-----------|------------|-----------|
| C | -1.419173 | 6.977277   | 0.282488  |
| C | -0.130905 | 6.559084   | 0.064035  |
| S | 0.891823  | 7.940966   | -0.252912 |
| C | -0.427443 | 9.056712   | -0.073387 |
| C | -1.581213 | 8.381954   | 0.203921  |
| C | 0.404128  | 5.218740   | 0.067645  |
| S | -0.644120 | 3.832028   | -0.007284 |
| C | 0.706729  | 2.722737   | 0.055194  |
| C | 1.890452  | 3.425782   | 0.116662  |
| C | 1.720790  | 4.823498   | 0.124160  |
| C | 0.400420  | 1.300839   | 0.030247  |
| C | 1.338513  | 0.241220   | 0.062372  |
| N | 0.908254  | -1.009768  | 0.031242  |
| C | -0.400421 | -1.300839  | -0.030249 |
| C | -1.338513 | -0.241220  | -0.062374 |
| N | -0.908254 | 1.009768   | -0.031244 |
| C | -0.706730 | -2.722737  | -0.055196 |
| S | 0.644120  | -3.832028  | 0.007282  |
| C | -0.404129 | -5.218740  | -0.067647 |
| C | -1.720790 | -4.823498  | -0.124162 |
| C | -1.890452 | -3.425782  | -0.116664 |
| C | 0.130905  | -6.559084  | -0.064037 |
| C | 1.419173  | -6.977277  | -0.282490 |
| C | 1.581212  | -8.381954  | -0.203923 |
| C | 0.427442  | -9.056712  | 0.073386  |
| S | -0.891824 | -7.940966  | 0.252910  |
| C | 0.225966  | -10.530130 | 0.221611  |
| C | -0.225966 | 10.530130  | -0.221613 |
| H | 2.543851  | 5.520380   | 0.187406  |
| H | -2.543851 | -5.520380  | -0.187408 |
| H | -2.224594 | 6.294301   | 0.509877  |

|   |           |            |           |
|---|-----------|------------|-----------|
| H | 2.224594  | -6.294301  | -0.509879 |
| H | -2.526628 | 8.883698   | 0.354328  |
| H | 2.526627  | -8.883698  | -0.354330 |
| H | 2.861302  | 2.965389   | 0.163093  |
| H | -2.861303 | -2.965389  | -0.163095 |
| H | -1.175426 | 11.047107  | -0.087868 |
| H | 1.175425  | -11.047107 | 0.087866  |
| H | 0.475528  | 10.922234  | 0.517558  |
| H | 0.161539  | 10.792087  | -1.208158 |
| H | -0.161540 | -10.792088 | 1.208156  |
| H | -0.475528 | -10.922234 | -0.517560 |
| C | -2.827395 | -0.422136  | -0.130809 |
| H | -3.124331 | -0.962277  | -1.031747 |
| H | -3.202841 | -0.982970  | 0.727152  |
| H | -3.297236 | 0.557433   | -0.140527 |
| C | 2.827394  | 0.422136   | 0.130807  |
| H | 3.202840  | 0.982970   | -0.727154 |
| H | 3.124331  | 0.962277   | 1.031745  |
| H | 3.297236  | -0.557434  | 0.140526  |

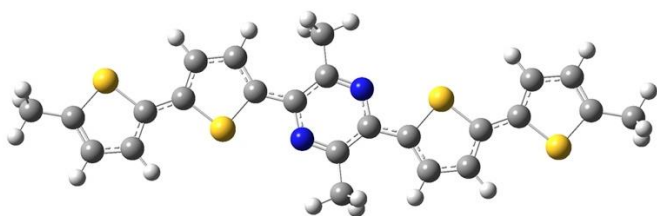

Figure S20. Optimized  $S_1$  geometry of MePyrz(TT)<sub>2</sub> with  $C_{2h}$  symmetry.

Table S8. Cartesian coordinates (in Å) of the B3LYP/6-311G(2df, 2pd) optimized  $S_1$  geometry of MePyrz(TT)<sub>2</sub> with  $C_{2h}$  symmetry.

|   |           |            |          |
|---|-----------|------------|----------|
| C | -1.449700 | 6.932479   | 0.000000 |
| C | -0.126866 | 6.515529   | 0.000000 |
| S | 0.928351  | 7.922284   | 0.000000 |
| C | -0.415338 | 9.022962   | 0.000000 |
| C | -1.600213 | 8.330499   | 0.000000 |
| C | 0.394295  | 5.195188   | 0.000000 |
| S | -0.656206 | 3.796259   | 0.000000 |
| C | 0.716958  | 2.692591   | 0.000000 |
| C | 1.915041  | 3.421502   | 0.000000 |
| C | 1.733146  | 4.796938   | 0.000000 |
| C | 0.414345  | 1.301664   | 0.000000 |
| C | 1.348882  | 0.222352   | 0.000000 |
| N | 0.924565  | -1.019790  | 0.000000 |
| C | -0.414345 | -1.301664  | 0.000000 |
| C | -1.348882 | -0.222352  | 0.000000 |
| N | -0.924565 | 1.019790   | 0.000000 |
| C | -0.716958 | -2.692591  | 0.000000 |
| S | 0.656206  | -3.796259  | 0.000000 |
| C | -0.394295 | -5.195188  | 0.000000 |
| C | -1.733146 | -4.796938  | 0.000000 |
| C | -1.915041 | -3.421502  | 0.000000 |
| C | 0.126866  | -6.515529  | 0.000000 |
| C | 1.449700  | -6.932479  | 0.000000 |
| C | 1.600213  | -8.330499  | 0.000000 |
| C | 0.415338  | -9.022962  | 0.000000 |
| S | -0.928351 | -7.922284  | 0.000000 |
| C | 0.208784  | -10.500324 | 0.000000 |
| C | -0.208784 | 10.500324  | 0.000000 |
| H | 2.551288  | 5.502925   | 0.000000 |
| H | -2.551288 | -5.502925  | 0.000000 |

|   |           |            |           |
|---|-----------|------------|-----------|
| H | -2.277549 | 6.238965   | 0.000000  |
| H | 2.277549  | -6.238965  | 0.000000  |
| H | -2.559603 | 8.828617   | 0.000000  |
| H | 2.559603  | -8.828617  | 0.000000  |
| H | 2.888845  | 2.965342   | 0.000000  |
| H | -2.888845 | -2.965342  | 0.000000  |
| H | -1.171845 | 11.009289  | 0.000000  |
| H | 1.171845  | -11.009289 | 0.000000  |
| H | 0.347756  | 10.834945  | 0.878875  |
| H | 0.347756  | 10.834945  | -0.878875 |
| H | -0.347756 | -10.834945 | 0.878875  |
| H | -0.347756 | -10.834945 | -0.878875 |
| C | -2.839669 | -0.407099  | 0.000000  |
| H | -3.174473 | -0.958348  | -0.880677 |
| H | -3.174473 | -0.958348  | 0.880677  |
| H | -3.310701 | 0.571990   | 0.000000  |
| C | 2.839669  | 0.407099   | 0.000000  |
| H | 3.174473  | 0.958348   | -0.880677 |
| H | 3.174473  | 0.958348   | 0.880677  |
| H | 3.310701  | -0.571990  | 0.000000  |



## Spectroscopic Analysis

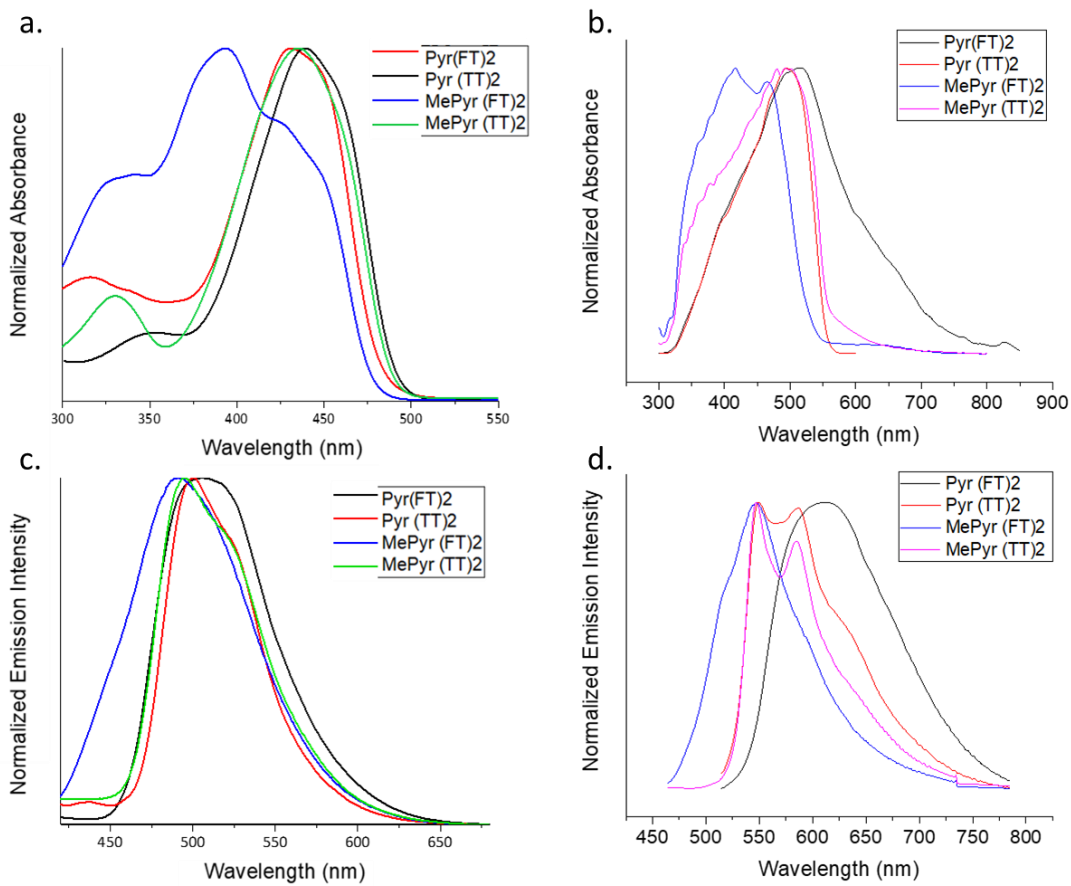

**Figure S21. Solution-state absorption/fluorescence spectra in DCM (a, c); solid-state diffuse reflectance and emission spectra (b,d)**

## Excited-State Lifetimes

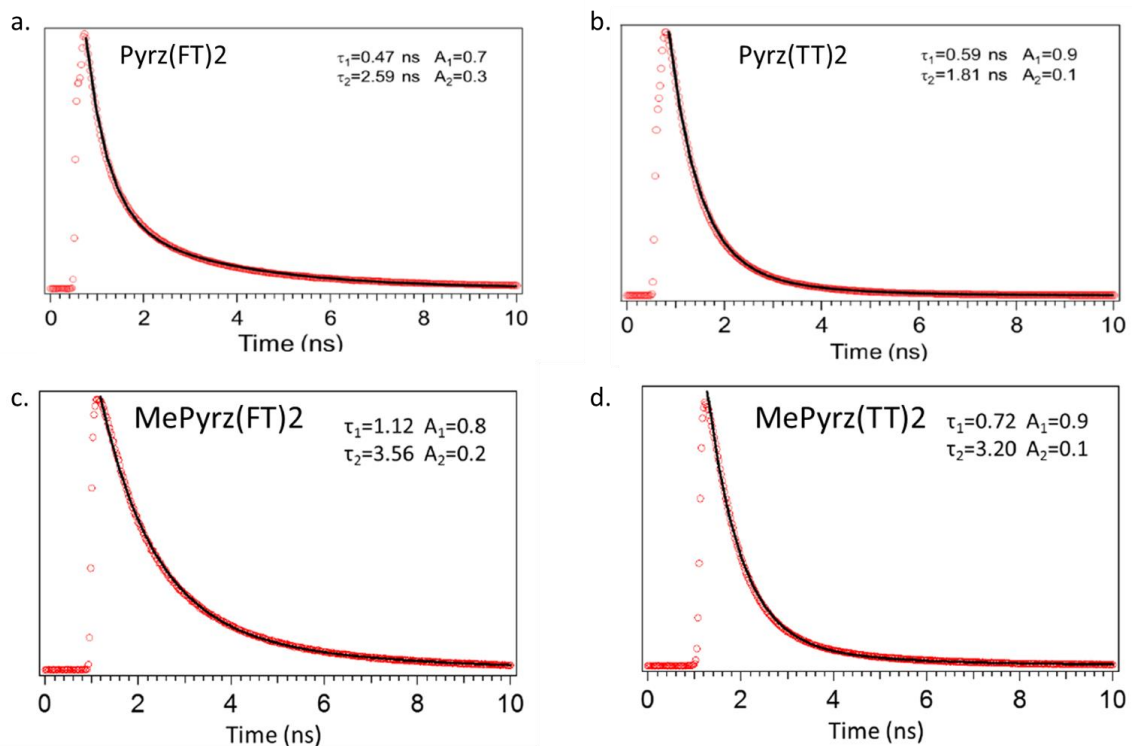

Figure S22. Excited state lifetime in the solid-state

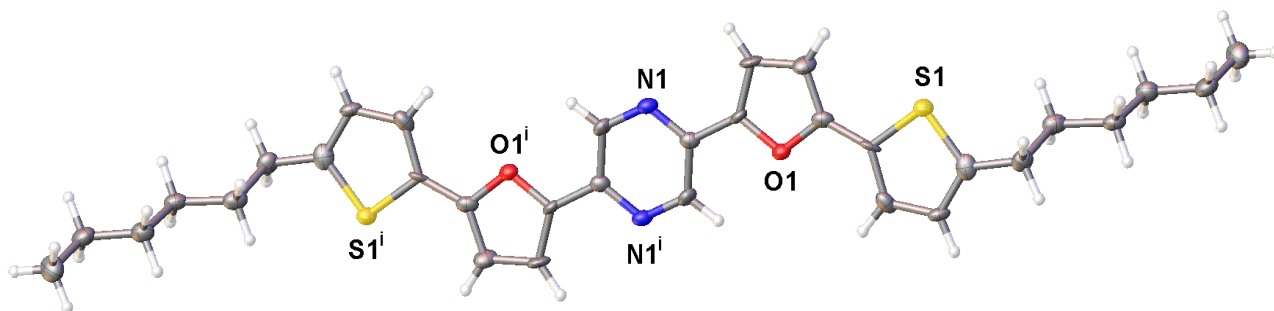

**Table S1. Crystal data and structure refinement for Pyrz(FT)<sub>2</sub>**

|                                   |                                                                              |                  |
|-----------------------------------|------------------------------------------------------------------------------|------------------|
| Identification code               | DK121117/LNP23                                                               |                  |
| Empirical formula                 | C <sub>32</sub> H <sub>36</sub> N <sub>2</sub> O <sub>2</sub> S <sub>2</sub> |                  |
| Formula weight                    | 544.75                                                                       |                  |
| Temperature                       | 100.0 K                                                                      |                  |
| Wavelength                        | 1.54178 Å                                                                    |                  |
| Crystal system                    | Monoclinic                                                                   |                  |
| Space group                       | P 21/c                                                                       |                  |
| Unit cell dimensions              | a = 16.4937(15) Å                                                            | α = 90°.         |
|                                   | b = 4.7436(4) Å                                                              | β = 106.926(5)°. |
|                                   | c = 18.9806(18) Å                                                            | γ = 90°.         |
| Volume                            | 1420.7(2) Å <sup>3</sup>                                                     |                  |
| Z                                 | 2                                                                            |                  |
| Density (calculated)              | 1.273 Mg/m <sup>3</sup>                                                      |                  |
| Absorption coefficient            | 1.942 mm <sup>-1</sup>                                                       |                  |
| F(000)                            | 580                                                                          |                  |
| Crystal size                      | 0.22 x 0.06 x 0.03 mm <sup>3</sup>                                           |                  |
| Theta range for data collection   | 2.800 to 68.351°.                                                            |                  |
| Index ranges                      | -19 ≤ h ≤ 19, -5 ≤ k ≤ 5, -22 ≤ l ≤ 22                                       |                  |
| Reflections collected             | 8176                                                                         |                  |
| Independent reflections           | 2596 [R(int) = 0.0617]                                                       |                  |
| Completeness to theta = 67.679°   | 99.7 %                                                                       |                  |
| Absorption correction             | Semi-empirical from equivalents                                              |                  |
| Max. and min. transmission        | 0.7531 and 0.5928                                                            |                  |
| Refinement method                 | Full-matrix least-squares on F <sup>2</sup>                                  |                  |
| Data / restraints / parameters    | 2596 / 0 / 173                                                               |                  |
| Goodness-of-fit on F <sup>2</sup> | 0.969                                                                        |                  |
| Final R indices [I > 2σ(I)]       | R1 = 0.0516, wR2 = 0.1224                                                    |                  |
| R indices (all data)              | R1 = 0.0780, wR2 = 0.1354                                                    |                  |
| Extinction coefficient            | n/a                                                                          |                  |
| Largest diff. peak and hole       | 0.423 and -0.273 e.Å <sup>-3</sup>                                           |                  |

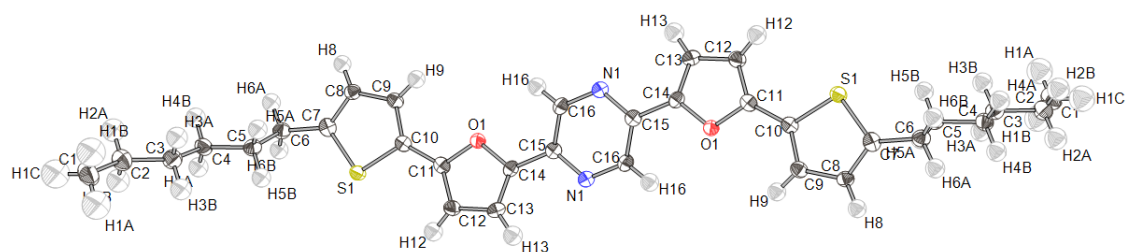

**Table S2. Atomic coordinates ( $\times 10^4$ ) and equivalent isotropic displacement parameters ( $\text{\AA}^2 \times 10^3$ ) for Pyr(FT)<sub>2</sub>. U(eq) is defined as one third of the trace of the orthogonalized U<sup>ij</sup> tensor.**

|       | x       | y        | z       | U(eq) |
|-------|---------|----------|---------|-------|
| S(1)  | 2433(1) | 11090(2) | 2674(1) | 26(1) |
| O(1)  | 983(1)  | 5327(4)  | 1370(1) | 24(1) |
| N(1)  | 701(2)  | 835(5)   | -220(1) | 27(1) |
| C(12) | 2228(2) | 6892(6)  | 1282(2) | 29(1) |
| C(9)  | 998(2)  | 8957(6)  | 2639(2) | 26(1) |
| C(6)  | 2411(2) | 14183(6) | 3924(2) | 29(1) |
| C(8)  | 1201(2) | 10883(6) | 3235(2) | 26(1) |
| C(3)  | 4367(2) | 13265(7) | 5661(2) | 34(1) |
| C(7)  | 1962(2) | 12223(6) | 3337(2) | 27(1) |
| C(5)  | 3212(2) | 12882(7) | 4449(2) | 30(1) |
| C(13) | 1915(2) | 4862(7)  | 730(2)  | 31(1) |
| C(2)  | 4817(2) | 15090(8) | 6315(2) | 42(1) |
| C(1)  | 5556(2) | 13597(9) | 6858(2) | 48(1) |
| C(15) | 550(2)  | 1910(6)  | 383(2)  | 23(1) |
| C(14) | 1159(2) | 3964(6)  | 795(2)  | 24(1) |
| C(10) | 1608(2) | 8821(5)  | 2278(2) | 23(1) |
| C(11) | 1646(2) | 7138(6)  | 1666(2) | 24(1) |
| C(16) | 154(2)  | -1059(6) | -596(2) | 27(1) |
| C(4)  | 3637(2) | 14734(6) | 5106(2) | 31(1) |

**Table S3. Bond lengths [ $\text{\AA}$ ] and angles [ $^\circ$ ] for Pyr(FT)<sub>2</sub>**

|               |          |
|---------------|----------|
| S(1)-C(7)     | 1.744(3) |
| S(1)-C(10)    | 1.726(3) |
| O(1)-C(14)    | 1.370(3) |
| O(1)-C(11)    | 1.374(3) |
| N(1)-C(15)    | 1.342(4) |
| N(1)-C(16)    | 1.326(4) |
| C(12)-H(12)   | 0.9500   |
| C(12)-C(13)   | 1.406(4) |
| C(12)-C(11)   | 1.369(4) |
| C(9)-H(9)     | 0.9500   |
| C(9)-C(8)     | 1.416(4) |
| C(9)-C(10)    | 1.374(4) |
| C(6)-H(6A)    | 0.9900   |
| C(6)-H(6B)    | 0.9900   |
| C(6)-C(7)     | 1.475(4) |
| C(6)-C(5)     | 1.534(4) |
| C(8)-H(8)     | 0.9500   |
| C(8)-C(7)     | 1.369(4) |
| C(3)-H(3A)    | 0.9900   |
| C(3)-H(3B)    | 0.9900   |
| C(3)-C(2)     | 1.518(5) |
| C(3)-C(4)     | 1.519(4) |
| C(5)-H(5A)    | 0.9900   |
| C(5)-H(5B)    | 0.9900   |
| C(5)-C(4)     | 1.519(4) |
| C(13)-H(13)   | 0.9500   |
| C(13)-C(14)   | 1.357(4) |
| C(2)-H(2A)    | 0.9900   |
| C(2)-H(2B)    | 0.9900   |
| C(2)-C(1)     | 1.522(5) |
| C(1)-H(1A)    | 0.9800   |
| C(1)-H(1B)    | 0.9800   |
| C(1)-H(1C)    | 0.9800   |
| C(15)-C(14)   | 1.453(4) |
| C(15)-C(16)#1 | 1.395(4) |
| C(10)-C(11)   | 1.425(4) |
| C(16)-H(16)   | 0.9500   |

|                   |           |
|-------------------|-----------|
| C(4)-H(4A)        | 0.9900    |
| C(4)-H(4B)        | 0.9900    |
| C(10)-S(1)-C(7)   | 92.68(14) |
| C(14)-O(1)-C(11)  | 107.1(2)  |
| C(16)-N(1)-C(15)  | 116.8(2)  |
| C(13)-C(12)-H(12) | 126.5     |
| C(11)-C(12)-H(12) | 126.5     |
| C(11)-C(12)-C(13) | 107.1(3)  |
| C(8)-C(9)-H(9)    | 123.5     |
| C(10)-C(9)-H(9)   | 123.5     |
| C(10)-C(9)-C(8)   | 113.1(2)  |
| H(6A)-C(6)-H(6B)  | 107.8     |
| C(7)-C(6)-H(6A)   | 109.1     |
| C(7)-C(6)-H(6B)   | 109.1     |
| C(7)-C(6)-C(5)    | 112.7(2)  |
| C(5)-C(6)-H(6A)   | 109.1     |
| C(5)-C(6)-H(6B)   | 109.1     |
| C(9)-C(8)-H(8)    | 123.0     |
| C(7)-C(8)-C(9)    | 113.9(3)  |
| C(7)-C(8)-H(8)    | 123.0     |
| H(3A)-C(3)-H(3B)  | 107.7     |
| C(2)-C(3)-H(3A)   | 108.8     |
| C(2)-C(3)-H(3B)   | 108.8     |
| C(2)-C(3)-C(4)    | 113.9(3)  |
| C(4)-C(3)-H(3A)   | 108.8     |
| C(4)-C(3)-H(3B)   | 108.8     |
| C(6)-C(7)-S(1)    | 120.6(2)  |
| C(8)-C(7)-S(1)    | 109.7(2)  |
| C(8)-C(7)-C(6)    | 129.6(3)  |
| C(6)-C(5)-H(5A)   | 108.8     |
| C(6)-C(5)-H(5B)   | 108.8     |
| H(5A)-C(5)-H(5B)  | 107.7     |
| C(4)-C(5)-C(6)    | 113.9(2)  |
| C(4)-C(5)-H(5A)   | 108.8     |
| C(4)-C(5)-H(5B)   | 108.8     |
| C(12)-C(13)-H(13) | 126.5     |

|                     |          |
|---------------------|----------|
| C(14)-C(13)-C(12)   | 107.1(3) |
| C(14)-C(13)-H(13)   | 126.5    |
| C(3)-C(2)-H(2A)     | 109.0    |
| C(3)-C(2)-H(2B)     | 109.0    |
| C(3)-C(2)-C(1)      | 113.1(3) |
| H(2A)-C(2)-H(2B)    | 107.8    |
| C(1)-C(2)-H(2A)     | 109.0    |
| C(1)-C(2)-H(2B)     | 109.0    |
| C(2)-C(1)-H(1A)     | 109.5    |
| C(2)-C(1)-H(1B)     | 109.5    |
| C(2)-C(1)-H(1C)     | 109.5    |
| H(1A)-C(1)-H(1B)    | 109.5    |
| H(1A)-C(1)-H(1C)    | 109.5    |
| H(1B)-C(1)-H(1C)    | 109.5    |
| N(1)-C(15)-C(14)    | 116.3(2) |
| N(1)-C(15)-C(16)#1  | 120.9(3) |
| C(16)#1-C(15)-C(14) | 122.8(3) |
| O(1)-C(14)-C(15)    | 118.1(2) |
| C(13)-C(14)-O(1)    | 109.8(2) |
| C(13)-C(14)-C(15)   | 132.1(3) |
| C(9)-C(10)-S(1)     | 110.6(2) |
| C(9)-C(10)-C(11)    | 130.1(3) |
| C(11)-C(10)-S(1)    | 119.3(2) |
| O(1)-C(11)-C(10)    | 117.8(2) |
| C(12)-C(11)-O(1)    | 109.0(2) |
| C(12)-C(11)-C(10)   | 133.2(3) |
| N(1)-C(16)-C(15)#1  | 122.3(3) |
| N(1)-C(16)-H(16)    | 118.8    |
| C(15)#1-C(16)-H(16) | 118.8    |
| C(3)-C(4)-C(5)      | 112.8(2) |
| C(3)-C(4)-H(4A)     | 109.0    |
| C(3)-C(4)-H(4B)     | 109.0    |
| C(5)-C(4)-H(4A)     | 109.0    |
| C(5)-C(4)-H(4B)     | 109.0    |
| H(4A)-C(4)-H(4B)    | 107.8    |

---

Symmetry transformations used to generate equivalent atoms:

#1 -x,-y,-z

**Table S4. Anisotropic displacement parameters ( $\text{\AA}^2 \times 10^3$ ) for Pyr<sub>2</sub>(FT)<sub>2</sub> The anisotropic displacement factor exponent takes the form:  $-2h^2 [h^2 a^* 2U^{11} + \dots + 2hk a^* b^* U^{12}]$**

|       | U <sup>11</sup> | U <sup>22</sup> | U <sup>33</sup> | U <sup>23</sup> | U <sup>13</sup> | U <sup>12</sup> |
|-------|-----------------|-----------------|-----------------|-----------------|-----------------|-----------------|
| S(1)  | 23(1)           | 27(1)           | 31(1)           | -1(1)           | 9(1)            | -2(1)           |
| O(1)  | 22(1)           | 24(1)           | 24(1)           | -1(1)           | 7(1)            | 1(1)            |
| N(1)  | 27(1)           | 28(1)           | 26(1)           | -1(1)           | 9(1)            | -1(1)           |
| C(12) | 29(2)           | 30(1)           | 29(2)           | 1(1)            | 10(1)           | -4(1)           |
| C(9)  | 23(1)           | 25(1)           | 30(2)           | 2(1)            | 7(1)            | 1(1)            |
| C(6)  | 27(1)           | 29(1)           | 32(2)           | 1(1)            | 10(1)           | 2(1)            |
| C(8)  | 23(1)           | 28(1)           | 26(1)           | 2(1)            | 7(1)            | 3(1)            |
| C(3)  | 32(2)           | 37(2)           | 34(2)           | 1(1)            | 9(1)            | 3(1)            |
| C(7)  | 27(1)           | 22(1)           | 30(2)           | 5(1)            | 3(1)            | 6(1)            |
| C(5)  | 28(2)           | 30(2)           | 32(2)           | 0(1)            | 11(1)           | 3(1)            |
| C(13) | 33(2)           | 34(2)           | 29(2)           | 0(1)            | 16(1)           | -2(1)           |
| C(2)  | 30(2)           | 53(2)           | 39(2)           | -4(2)           | 4(1)            | 1(2)            |
| C(1)  | 38(2)           | 58(2)           | 40(2)           | 7(2)            | -1(2)           | -3(2)           |
| C(15) | 23(1)           | 21(1)           | 24(1)           | 4(1)            | 5(1)            | 6(1)            |
| C(14) | 26(1)           | 23(1)           | 22(1)           | 0(1)            | 7(1)            | 5(1)            |
| C(10) | 23(1)           | 19(1)           | 27(1)           | 5(1)            | 5(1)            | 2(1)            |
| C(11) | 22(1)           | 23(1)           | 25(1)           | 6(1)            | 2(1)            | 2(1)            |
| C(16) | 29(1)           | 27(1)           | 25(1)           | -3(1)           | 9(1)            | 3(1)            |
| C(4)  | 25(1)           | 33(2)           | 36(2)           | -3(1)           | 7(1)            | 1(1)            |



**Table S5. Hydrogen coordinates ( $\times 10^4$ ) and isotropic displacement parameters ( $\text{\AA}^2 \times 10^3$ ) for Pyr<sub>z</sub>(FT)<sub>2</sub>**

|       | x    | y     | z     | U(eq) |
|-------|------|-------|-------|-------|
| H(12) | 2745 | 7901  | 1372  | 35    |
| H(9)  | 493  | 7871  | 2503  | 31    |
| H(6A) | 2023 | 14758 | 4211  | 35    |
| H(6B) | 2569 | 15898 | 3698  | 35    |
| H(8)  | 842  | 11215 | 3537  | 31    |
| H(3A) | 4148 | 11557 | 5843  | 41    |
| H(3B) | 4784 | 12647 | 5408  | 41    |
| H(5A) | 3062 | 11058 | 4631  | 35    |
| H(5B) | 3622 | 12494 | 4170  | 35    |
| H(13) | 2182 | 4238  | 377   | 37    |
| H(2A) | 4405 | 15678 | 6575  | 50    |
| H(2B) | 5030 | 16813 | 6133  | 50    |
| H(1A) | 5974 | 13046 | 6607  | 72    |
| H(1B) | 5349 | 11912 | 7049  | 72    |
| H(1C) | 5821 | 14871 | 7266  | 72    |
| H(16) | 243  | -1865 | -1025 | 32    |
| H(4A) | 3852 | 16464 | 4929  | 38    |
| H(4B) | 3211 | 15308 | 5353  | 38    |

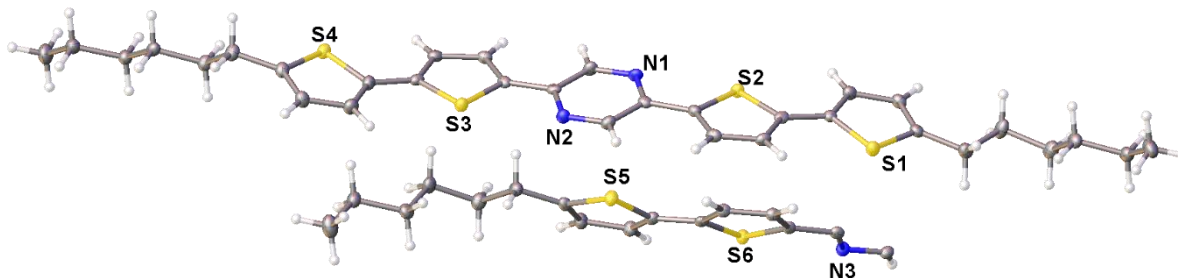

**Table S6. Crystal data and structure refinement for Pyrz(TT)<sub>2</sub>**

|                                   |                                                               |                  |
|-----------------------------------|---------------------------------------------------------------|------------------|
| Identification code               | pyrzTh2 (DK052518)                                            |                  |
| Empirical formula                 | C <sub>32</sub> H <sub>36</sub> N <sub>2</sub> S <sub>4</sub> |                  |
| Formula weight                    | 576.87                                                        |                  |
| Temperature                       | 100 K                                                         |                  |
| Wavelength                        | 0.71073 Å                                                     |                  |
| Crystal system                    | Monoclinic                                                    |                  |
| Space group                       | P 21/c                                                        |                  |
| Unit cell dimensions              | a = 26.416(3) Å                                               | α = 90°.         |
|                                   | b = 5.6442(5) Å                                               | β = 103.328(3)°. |
|                                   | c = 29.724(3) Å                                               | γ = 90°.         |
| Volume                            | 4312.5(7) Å <sup>3</sup>                                      |                  |
| Z, Z'                             | 6, 1.5                                                        |                  |
| Density (calculated)              | 1.333 Mg/m <sup>3</sup>                                       |                  |
| Absorption coefficient            | 0.356 mm <sup>-1</sup>                                        |                  |
| F(000)                            | 1836                                                          |                  |
| Crystal size                      | 0.27 x 0.16 x 0.1 mm <sup>3</sup>                             |                  |
| Theta range for data collection   | 1.408 to 25.337°.                                             |                  |
| Index ranges                      | -31 ≤ h ≤ 31, -6 ≤ k ≤ 6, -35 ≤ l ≤ 34                        |                  |
| Reflections collected             | 26925                                                         |                  |
| Independent reflections           | 7833 [R(int) = 0.0516]                                        |                  |
| Completeness to theta = 25.242°   | 99.6 %                                                        |                  |
| Absorption correction             | Semi-empirical from equivalents                               |                  |
| Max. and min. transmission        | 0.7452 and 0.6749                                             |                  |
| Refinement method                 | Full-matrix least-squares on F <sup>2</sup>                   |                  |
| Data / restraints / parameters    | 7833 / 0 / 517                                                |                  |
| Goodness-of-fit on F <sup>2</sup> | 1.084                                                         |                  |
| Final R indices [I > 2σ(I)]       | R1 = 0.0530, wR2 = 0.1018                                     |                  |
| R indices (all data)              | R1 = 0.0754, wR2 = 0.1096                                     |                  |
| Extinction coefficient            | n/a                                                           |                  |
| Largest diff. peak and hole       | 0.375 and -0.447 e.Å <sup>-3</sup>                            |                  |

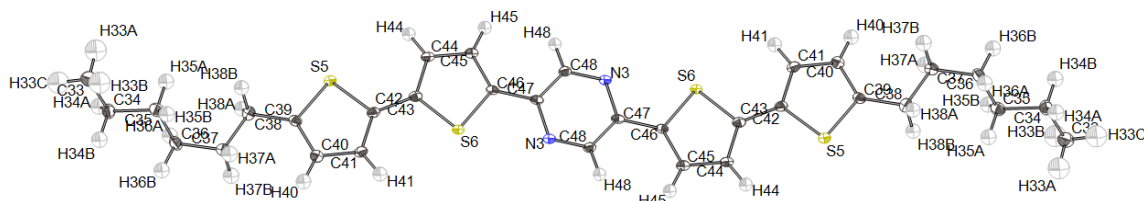

**Table S7. Atomic coordinates ( $\times 10^4$ ) and equivalent isotropic displacement parameters ( $\text{\AA}^2 \times 10^3$ ) for Pyr $z$ (TT) $_2$  U(eq) is defined as one third of the trace of the orthogonalized  $U_{ij}$  tensor.**

|       | x        | y        | z       | U(eq) |
|-------|----------|----------|---------|-------|
| S(2)  | 8118(1)  | 4712(1)  | 3348(1) | 15(1) |
| S(3)  | 5135(1)  | 6289(1)  | 3298(1) | 16(1) |
| S(4)  | 3550(1)  | 3645(1)  | 2770(1) | 17(1) |
| S(5)  | 6970(1)  | 2960(1)  | 4395(1) | 17(1) |
| S(1)  | 9687(1)  | 7463(1)  | 3914(1) | 17(1) |
| S(6)  | 8495(1)  | -286(1)  | 4941(1) | 15(1) |
| N(2)  | 6262(1)  | 7028(4)  | 3443(1) | 16(1) |
| N(1)  | 6982(1)  | 4066(4)  | 3158(1) | 16(1) |
| N(3)  | 9615(1)  | -1312(4) | 5144(1) | 15(1) |
| C(19) | 5568(1)  | 4295(5)  | 3151(1) | 14(1) |
| C(47) | 9507(1)  | 776(5)   | 4920(1) | 14(1) |
| C(18) | 6117(1)  | 4933(5)  | 3230(1) | 14(1) |
| C(15) | 7127(1)  | 6159(5)  | 3371(1) | 14(1) |
| C(39) | 6489(1)  | 1042(5)  | 4485(1) | 16(1) |
| C(7)  | 10144(1) | 5422(5)  | 3821(1) | 16(1) |
| C(16) | 6759(1)  | 7601(5)  | 3512(1) | 16(1) |
| C(14) | 7678(1)  | 6770(5)  | 3467(1) | 13(1) |
| C(30) | 1418(1)  | 1323(5)  | 2792(1) | 19(1) |
| C(44) | 8210(1)  | 3708(5)  | 4556(1) | 15(1) |
| C(21) | 4777(1)  | 2370(5)  | 2913(1) | 16(1) |
| C(46) | 8970(1)  | 1579(5)  | 4821(1) | 13(1) |
| C(17) | 6482(1)  | 3513(5)  | 3089(1) | 17(1) |

|       |          |          |         |       |
|-------|----------|----------|---------|-------|
| C(45) | 8754(1)  | 3644(5)  | 4623(1) | 15(1) |
| C(48) | 10104(1) | -2044(5) | 5222(1) | 14(1) |
| C(41) | 7260(1)  | -910(5)  | 4818(1) | 18(1) |
| C(27) | 2546(1)  | 5596(5)  | 2679(1) | 20(1) |
| C(40) | 6709(1)  | -915(5)  | 4717(1) | 19(1) |
| C(28) | 2285(1)  | 3409(5)  | 2830(1) | 18(1) |
| C(26) | 3120(1)  | 5794(5)  | 2871(1) | 17(1) |
| C(43) | 8007(1)  | 1709(5)  | 4708(1) | 14(1) |
| C(8)  | 9902(1)  | 3545(5)  | 3575(1) | 17(1) |
| C(20) | 5319(1)  | 2290(5)  | 2954(1) | 15(1) |
| C(24) | 3932(1)  | 7320(5)  | 3226(1) | 20(1) |
| C(42) | 7465(1)  | 1081(5)  | 4670(1) | 15(1) |
| C(9)  | 9350(1)  | 3719(5)  | 3460(1) | 17(1) |
| C(5)  | 11069(1) | 4056(5)  | 3885(1) | 24(1) |
| C(38) | 5925(1)  | 1626(5)  | 4294(1) | 19(1) |
| C(37) | 5557(1)  | -86(5)   | 4446(1) | 21(1) |
| C(10) | 9170(1)  | 5745(5)  | 3619(1) | 13(1) |
| C(12) | 8470(1)  | 8637(5)  | 3732(1) | 16(1) |
| C(6)  | 10710(1) | 5847(5)  | 4030(1) | 20(1) |
| C(35) | 4771(1)  | 2671(5)  | 4425(1) | 21(1) |
| C(11) | 8641(1)  | 6547(5)  | 3584(1) | 14(1) |
| C(29) | 1694(1)  | 3496(5)  | 2665(1) | 18(1) |
| C(2)  | 12464(1) | 6843(5)  | 4124(1) | 21(1) |
| C(22) | 4612(1)  | 4428(5)  | 3079(1) | 14(1) |
| C(25) | 3386(1)  | 7609(5)  | 3120(1) | 20(1) |
| C(36) | 4983(1)  | 454(5)   | 4241(1) | 21(1) |
| C(13) | 7926(1)  | 8767(5)  | 3665(1) | 17(1) |
| C(23) | 4090(1)  | 5263(5)  | 3060(1) | 16(1) |
| C(4)  | 11646(1) | 4461(5)  | 4107(1) | 23(1) |
| C(34) | 4178(1)  | 2821(6)  | 4276(1) | 22(1) |
| C(32) | 558(1)   | -723(6)  | 2776(1) | 31(1) |
| C(3)  | 11874(1) | 6734(5)  | 3962(1) | 21(1) |
| C(31) | 825(1)   | 1475(5)  | 2650(1) | 21(1) |
| C(33) | 3955(1)  | 4992(6)  | 4466(1) | 32(1) |
| C(1)  | 12695(1) | 9168(6)  | 4010(1) | 29(1) |

---

**Table S8. Bond lengths [Å] and angles [°] for Pyr<sub>z</sub>(TT)<sub>2</sub>**

---

|               |          |
|---------------|----------|
| S(2)-C(14)    | 1.737(3) |
| S(2)-C(11)    | 1.739(3) |
| S(3)-C(19)    | 1.730(3) |
| S(3)-C(22)    | 1.738(3) |
| S(4)-C(26)    | 1.733(3) |
| S(4)-C(23)    | 1.745(3) |
| S(5)-C(39)    | 1.736(3) |
| S(5)-C(42)    | 1.735(3) |
| S(1)-C(7)     | 1.736(3) |
| S(1)-C(10)    | 1.738(3) |
| S(6)-C(46)    | 1.737(3) |
| S(6)-C(43)    | 1.730(3) |
| N(2)-C(18)    | 1.355(3) |
| N(2)-C(16)    | 1.321(4) |
| N(1)-C(15)    | 1.353(4) |
| N(1)-C(17)    | 1.327(4) |
| N(3)-C(47)    | 1.351(3) |
| N(3)-C(48)    | 1.325(4) |
| C(19)-C(18)   | 1.461(4) |
| C(19)-C(20)   | 1.369(4) |
| C(47)-C(46)   | 1.454(4) |
| C(47)-C(48)#1 | 1.396(4) |
| C(18)-C(17)   | 1.392(4) |
| C(15)-C(16)   | 1.405(4) |
| C(15)-C(14)   | 1.457(4) |
| C(39)-C(40)   | 1.360(4) |
| C(39)-C(38)   | 1.503(4) |
| C(7)-C(8)     | 1.359(4) |
| C(7)-C(6)     | 1.503(4) |
| C(14)-C(13)   | 1.368(4) |
| C(30)-C(29)   | 1.519(4) |
| C(30)-C(31)   | 1.527(4) |
| C(44)-C(45)   | 1.407(4) |
| C(44)-C(43)   | 1.369(4) |
| C(21)-C(20)   | 1.409(4) |

|                  |           |
|------------------|-----------|
| C(21)-C(22)      | 1.372(4)  |
| C(46)-C(45)      | 1.369(4)  |
| C(48)-C(47)#1    | 1.396(4)  |
| C(41)-C(40)      | 1.417(4)  |
| C(41)-C(42)      | 1.364(4)  |
| C(27)-C(28)      | 1.531(4)  |
| C(27)-C(26)      | 1.498(4)  |
| C(28)-C(29)      | 1.525(4)  |
| C(26)-C(25)      | 1.360(4)  |
| C(43)-C(42)      | 1.455(4)  |
| C(8)-C(9)        | 1.423(4)  |
| C(24)-C(25)      | 1.412(4)  |
| C(24)-C(23)      | 1.364(4)  |
| C(9)-C(10)       | 1.364(4)  |
| C(5)-C(6)        | 1.514(4)  |
| C(5)-C(4)        | 1.533(4)  |
| C(38)-C(37)      | 1.511(4)  |
| C(37)-C(36)      | 1.528(4)  |
| C(10)-C(11)      | 1.449(4)  |
| C(12)-C(11)      | 1.372(4)  |
| C(12)-C(13)      | 1.409(4)  |
| C(35)-C(36)      | 1.524(4)  |
| C(35)-C(34)      | 1.530(4)  |
| C(2)-C(3)        | 1.523(4)  |
| C(2)-C(1)        | 1.517(4)  |
| C(22)-C(23)      | 1.446(4)  |
| C(4)-C(3)        | 1.520(4)  |
| C(34)-C(33)      | 1.521(4)  |
| C(32)-C(31)      | 1.517(4)  |
| C(14)-S(2)-C(11) | 91.58(14) |
| C(19)-S(3)-C(22) | 91.56(14) |
| C(26)-S(4)-C(23) | 92.37(14) |
| C(42)-S(5)-C(39) | 92.61(14) |
| C(7)-S(1)-C(10)  | 92.48(14) |
| C(43)-S(6)-C(46) | 91.67(14) |
| C(16)-N(2)-C(18) | 116.7(2)  |

|                     |          |
|---------------------|----------|
| C(17)-N(1)-C(15)    | 116.3(2) |
| C(48)-N(3)-C(47)    | 116.4(2) |
| C(18)-C(19)-S(3)    | 119.2(2) |
| C(20)-C(19)-S(3)    | 111.4(2) |
| C(20)-C(19)-C(18)   | 129.3(3) |
| N(3)-C(47)-C(46)    | 117.3(2) |
| N(3)-C(47)-C(48)#1  | 120.6(3) |
| C(48)#1-C(47)-C(46) | 122.1(3) |
| N(2)-C(18)-C(19)    | 117.0(2) |
| N(2)-C(18)-C(17)    | 120.2(3) |
| C(17)-C(18)-C(19)   | 122.8(3) |
| N(1)-C(15)-C(16)    | 120.3(3) |
| N(1)-C(15)-C(14)    | 117.3(2) |
| C(16)-C(15)-C(14)   | 122.2(3) |
| C(40)-C(39)-S(5)    | 110.0(2) |
| C(40)-C(39)-C(38)   | 129.9(3) |
| C(38)-C(39)-S(5)    | 120.1(2) |
| C(8)-C(7)-S(1)      | 110.2(2) |
| C(8)-C(7)-C(6)      | 130.3(3) |
| C(6)-C(7)-S(1)      | 119.4(2) |
| N(2)-C(16)-C(15)    | 122.9(3) |
| C(15)-C(14)-S(2)    | 119.2(2) |
| C(13)-C(14)-S(2)    | 111.2(2) |
| C(13)-C(14)-C(15)   | 129.5(3) |
| C(29)-C(30)-C(31)   | 114.0(2) |
| C(43)-C(44)-C(45)   | 113.4(3) |
| C(22)-C(21)-C(20)   | 113.4(3) |
| C(47)-C(46)-S(6)    | 119.1(2) |
| C(45)-C(46)-S(6)    | 110.9(2) |
| C(45)-C(46)-C(47)   | 130.0(3) |
| N(1)-C(17)-C(18)    | 123.5(3) |
| C(46)-C(45)-C(44)   | 113.1(3) |
| N(3)-C(48)-C(47)#1  | 123.0(3) |
| C(42)-C(41)-C(40)   | 113.4(3) |
| C(26)-C(27)-C(28)   | 115.7(2) |
| C(39)-C(40)-C(41)   | 113.9(3) |
| C(29)-C(28)-C(27)   | 112.1(2) |

|                   |          |
|-------------------|----------|
| C(27)-C(26)-S(4)  | 121.9(2) |
| C(25)-C(26)-S(4)  | 110.2(2) |
| C(25)-C(26)-C(27) | 127.9(3) |
| C(44)-C(43)-S(6)  | 110.9(2) |
| C(44)-C(43)-C(42) | 128.8(3) |
| C(42)-C(43)-S(6)  | 120.1(2) |
| C(7)-C(8)-C(9)    | 113.8(3) |
| C(19)-C(20)-C(21) | 112.9(3) |
| C(23)-C(24)-C(25) | 113.6(3) |
| C(41)-C(42)-S(5)  | 110.1(2) |
| C(41)-C(42)-C(43) | 129.2(3) |
| C(43)-C(42)-S(5)  | 120.7(2) |
| C(10)-C(9)-C(8)   | 113.2(3) |
| C(6)-C(5)-C(4)    | 113.8(3) |
| C(39)-C(38)-C(37) | 113.4(2) |
| C(38)-C(37)-C(36) | 113.7(2) |
| C(9)-C(10)-S(1)   | 110.3(2) |
| C(9)-C(10)-C(11)  | 130.1(3) |
| C(11)-C(10)-S(1)  | 119.6(2) |
| C(11)-C(12)-C(13) | 113.6(3) |
| C(7)-C(6)-C(5)    | 113.8(2) |
| C(36)-C(35)-C(34) | 112.3(3) |
| C(10)-C(11)-S(2)  | 120.4(2) |
| C(12)-C(11)-S(2)  | 110.6(2) |
| C(12)-C(11)-C(10) | 128.9(3) |
| C(30)-C(29)-C(28) | 114.1(2) |
| C(1)-C(2)-C(3)    | 113.6(3) |
| C(21)-C(22)-S(3)  | 110.7(2) |
| C(21)-C(22)-C(23) | 129.9(3) |
| C(23)-C(22)-S(3)  | 119.1(2) |
| C(26)-C(25)-C(24) | 114.0(3) |
| C(35)-C(36)-C(37) | 115.7(3) |
| C(14)-C(13)-C(12) | 112.9(3) |
| C(24)-C(23)-S(4)  | 109.9(2) |
| C(24)-C(23)-C(22) | 129.2(3) |
| C(22)-C(23)-S(4)  | 120.8(2) |
| C(3)-C(4)-C(5)    | 115.1(3) |



|                   |          |
|-------------------|----------|
| C(33)-C(34)-C(35) | 113.3(3) |
| C(4)-C(3)-C(2)    | 112.8(2) |
| C(32)-C(31)-C(30) | 113.1(3) |

Symmetry transformations used to generate equivalent atoms:

#1 -x+2,-y,-z+1

**Table S9. Anisotropic displacement parameters ( $\text{\AA}^2 \times 10^3$ ) for Pyr<sub>2</sub>(TT)<sub>2</sub> The anisotropic displacement factor exponent takes the form:  $-2h^2 a^* U_{11} + \dots + 2hk a^* b^* U_{12}$**

|       | U11   | U22   | U33   | U23   | U13  | U12   |
|-------|-------|-------|-------|-------|------|-------|
| S(2)  | 17(1) | 9(1)  | 19(1) | -2(1) | 4(1) | 0(1)  |
| S(3)  | 16(1) | 11(1) | 19(1) | -3(1) | 3(1) | 0(1)  |
| S(4)  | 16(1) | 12(1) | 21(1) | 0(1)  | 2(1) | -1(1) |
| S(5)  | 16(1) | 12(1) | 21(1) | 3(1)  | 3(1) | 0(1)  |
| S(1)  | 18(1) | 12(1) | 21(1) | -2(1) | 4(1) | -1(1) |
| S(6)  | 15(1) | 10(1) | 20(1) | 3(1)  | 4(1) | -1(1) |
| N(2)  | 17(1) | 11(1) | 18(1) | -2(1) | 3(1) | 1(1)  |
| N(1)  | 20(1) | 12(1) | 15(1) | -4(1) | 2(1) | 2(1)  |
| N(3)  | 16(1) | 10(1) | 18(1) | 2(1)  | 4(1) | -1(1) |
| C(19) | 18(2) | 11(1) | 12(1) | 4(1)  | 4(1) | 4(1)  |
| C(47) | 19(2) | 8(1)  | 14(2) | -2(1) | 4(1) | -2(1) |
| C(18) | 20(2) | 11(1) | 9(1)  | 2(1)  | 2(1) | 3(1)  |
| C(15) | 19(2) | 11(1) | 12(2) | 4(1)  | 5(1) | 2(1)  |
| C(39) | 17(2) | 13(1) | 19(2) | -3(1) | 7(1) | -3(1) |
| C(7)  | 19(2) | 15(2) | 15(2) | 1(1)  | 7(1) | 1(1)  |
| C(16) | 18(2) | 11(1) | 16(2) | 0(1)  | 0(1) | -1(1) |
| C(14) | 16(2) | 11(1) | 13(2) | 1(1)  | 4(1) | 3(1)  |
| C(30) | 18(2) | 19(2) | 19(2) | 1(1)  | 4(1) | 0(1)  |
| C(44) | 20(2) | 9(1)  | 16(2) | 1(1)  | 4(1) | -1(1) |
| C(21) | 21(2) | 14(2) | 13(2) | 0(1)  | 4(1) | -1(1) |
| C(46) | 16(2) | 9(1)  | 15(2) | -2(1) | 4(1) | -2(1) |
| C(17) | 19(2) | 10(1) | 19(2) | -4(1) | 2(1) | -1(1) |
| C(45) | 20(2) | 10(1) | 15(2) | 0(1)  | 4(1) | -1(1) |
| C(48) | 17(2) | 11(1) | 14(2) | 2(1)  | 1(1) | -1(1) |
| C(41) | 19(2) | 13(2) | 20(2) | 3(1)  | 3(1) | 3(1)  |

|       |       |       |       |       |       |       |
|-------|-------|-------|-------|-------|-------|-------|
| C(27) | 18(2) | 16(2) | 25(2) | 4(1)  | 2(1)  | 1(1)  |
| C(40) | 18(2) | 17(2) | 24(2) | 3(1)  | 6(1)  | -1(1) |
| C(28) | 18(2) | 14(2) | 22(2) | 2(1)  | 3(1)  | -1(1) |
| C(26) | 18(2) | 13(2) | 21(2) | 4(1)  | 4(1)  | 0(1)  |
| C(43) | 19(2) | 10(1) | 11(1) | -3(1) | 2(1)  | 1(1)  |
| C(8)  | 21(2) | 12(1) | 20(2) | 0(1)  | 8(1)  | 2(1)  |
| C(20) | 21(2) | 10(1) | 15(2) | 1(1)  | 5(1)  | 2(1)  |
| C(24) | 20(2) | 16(2) | 22(2) | -3(1) | 3(1)  | -4(1) |
| C(42) | 18(2) | 10(1) | 16(2) | -1(1) | 2(1)  | 1(1)  |
| C(9)  | 19(2) | 14(2) | 18(2) | -2(1) | 6(1)  | -3(1) |
| C(5)  | 17(2) | 16(2) | 35(2) | -4(1) | 0(1)  | 3(1)  |
| C(38) | 17(2) | 20(2) | 18(2) | 1(1)  | 3(1)  | 2(1)  |
| C(37) | 21(2) | 16(2) | 27(2) | 2(1)  | 3(1)  | -1(1) |
| C(10) | 16(2) | 10(1) | 12(2) | 2(1)  | 4(1)  | -1(1) |
| C(12) | 21(2) | 11(1) | 16(2) | -1(1) | 1(1)  | -3(1) |
| C(6)  | 20(2) | 18(2) | 23(2) | -3(1) | 7(1)  | -2(1) |
| C(35) | 21(2) | 22(2) | 21(2) | 1(1)  | 8(1)  | -3(1) |
| C(11) | 20(2) | 10(1) | 13(2) | 4(1)  | 3(1)  | -2(1) |
| C(29) | 17(2) | 17(2) | 18(2) | -3(1) | 2(1)  | 2(1)  |
| C(2)  | 19(2) | 24(2) | 21(2) | -2(1) | 5(1)  | 4(1)  |
| C(22) | 18(2) | 11(1) | 11(1) | 1(1)  | 1(1)  | -2(1) |
| C(25) | 20(2) | 14(2) | 26(2) | -1(1) | 8(1)  | 0(1)  |
| C(36) | 17(2) | 20(2) | 25(2) | -3(1) | 4(1)  | -4(1) |
| C(13) | 22(2) | 11(1) | 16(2) | 0(1)  | 5(1)  | 4(1)  |
| C(23) | 15(2) | 15(2) | 18(2) | 2(1)  | 3(1)  | -1(1) |
| C(4)  | 21(2) | 18(2) | 30(2) | -1(1) | 1(1)  | 4(1)  |
| C(34) | 17(2) | 25(2) | 23(2) | 4(1)  | 4(1)  | -1(1) |
| C(32) | 22(2) | 34(2) | 38(2) | 1(2)  | 10(2) | -4(2) |
| C(3)  | 19(2) | 23(2) | 21(2) | 3(1)  | 4(1)  | 6(1)  |
| C(31) | 19(2) | 24(2) | 21(2) | -1(1) | 5(1)  | -1(1) |
| C(33) | 26(2) | 25(2) | 48(2) | 2(2)  | 14(2) | -1(2) |
| C(1)  | 24(2) | 35(2) | 31(2) | 7(2)  | 14(2) | 6(2)  |

---

**Table S10. Hydrogen coordinates ( $\times 10^4$ ) and isotropic displacement parameters ( $\text{\AA}^2 \times 10^3$ ) for Pyr<sub>2</sub>(TT)<sub>2</sub>**

|        | x     | y     | z    | U(eq) |
|--------|-------|-------|------|-------|
| H(16)  | 6872  | 9053  | 3664 | 19    |
| H(30A) | 1525  | 1087  | 3131 | 22    |
| H(30B) | 1532  | -82   | 2642 | 22    |
| H(44)  | 8002  | 5011  | 4420 | 18    |
| H(21)  | 4549  | 1121  | 2784 | 19    |
| H(17)  | 6367  | 2070  | 2934 | 20    |
| H(45)  | 8952  | 4904  | 4539 | 18    |
| H(48)  | 10193 | -3499 | 5381 | 17    |
| H(41)  | 7467  | -2170 | 4975 | 21    |
| H(27A) | 2479  | 5592  | 2337 | 24    |
| H(27B) | 2377  | 7026  | 2770 | 24    |
| H(40)  | 6512  | -2171 | 4803 | 23    |
| H(28A) | 2417  | 1970  | 2705 | 22    |
| H(28B) | 2379  | 3300  | 3172 | 22    |
| H(8)   | 10085 | 2237  | 3488 | 20    |
| H(20)  | 5493  | 984   | 2856 | 18    |
| H(24)  | 4166  | 8450  | 3396 | 23    |
| H(9)   | 9129  | 2543  | 3289 | 20    |
| H(5A)  | 11018 | 4114  | 3545 | 28    |
| H(5B)  | 10970 | 2450  | 3968 | 28    |
| H(38A) | 5854  | 1627  | 3952 | 22    |
| H(38B) | 5856  | 3243  | 4394 | 22    |
| H(37A) | 5621  | -48   | 4787 | 26    |
| H(37B) | 5634  | -1709 | 4354 | 26    |
| H(12)  | 8698  | 9879  | 3867 | 20    |
| H(6A)  | 10767 | 5811  | 4371 | 24    |
| H(6B)  | 10805 | 7450  | 3942 | 24    |
| H(35A) | 4924  | 4088  | 4311 | 25    |
| H(35B) | 4879  | 2673  | 4767 | 25    |

|        |       |       |      |    |
|--------|-------|-------|------|----|
| H(29A) | 1564  | 4914  | 2799 | 21 |
| H(29B) | 1604  | 3677  | 2324 | 21 |
| H(2A)  | 12562 | 6596  | 4462 | 26 |
| H(2B)  | 12617 | 5533  | 3977 | 26 |
| H(25)  | 3219  | 8951  | 3214 | 23 |
| H(36A) | 4932  | 615   | 3902 | 25 |
| H(36B) | 4775  | -921  | 4299 | 25 |
| H(13)  | 7749  | 10102 | 3750 | 20 |
| H(4A)  | 11692 | 4477  | 4447 | 28 |
| H(4B)  | 11847 | 3104  | 4029 | 28 |
| H(34A) | 4072  | 2850  | 3935 | 26 |
| H(34B) | 4026  | 1381  | 4384 | 26 |
| H(32A) | 656   | -2095 | 2613 | 46 |
| H(32B) | 180   | -505  | 2687 | 46 |
| H(32C) | 665   | -988  | 3111 | 46 |
| H(3A)  | 11721 | 8104  | 4091 | 25 |
| H(3B)  | 11776 | 6864  | 3621 | 25 |
| H(31A) | 709   | 2867  | 2803 | 26 |
| H(31B) | 717   | 1724  | 2312 | 26 |
| H(33A) | 4078  | 6427  | 4338 | 48 |
| H(33B) | 4070  | 5012  | 4803 | 48 |
| H(33C) | 3575  | 4935  | 4376 | 48 |
| H(1A)  | 12585 | 9469  | 3677 | 43 |
| H(1B)  | 13075 | 9078  | 4101 | 43 |
| H(1C)  | 12574 | 10458 | 4180 | 43 |

---

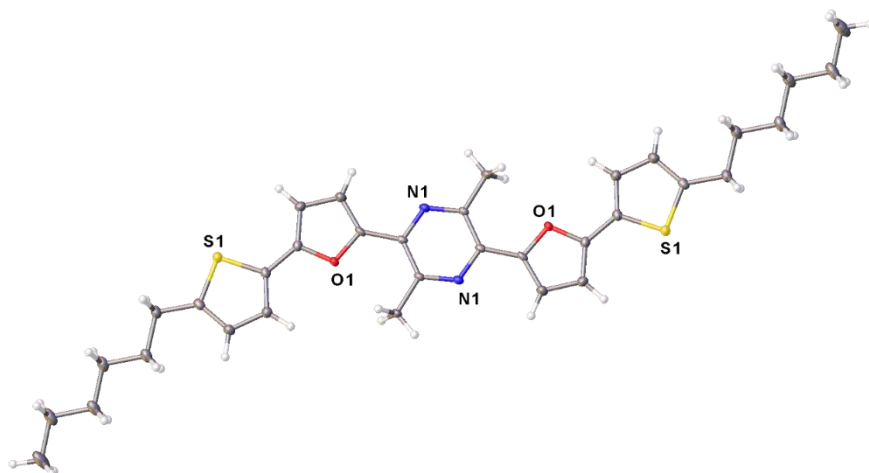

**Table S11. Crystal data and structure refinement for MePyrz(FT)<sub>2</sub>**

|                                   |                                                                              |                 |
|-----------------------------------|------------------------------------------------------------------------------|-----------------|
| Identification code               | TFMePtr2FT                                                                   |                 |
| Empirical formula                 | C <sub>34</sub> H <sub>40</sub> N <sub>2</sub> O <sub>2</sub> S <sub>2</sub> |                 |
| Formula weight                    | 572.80                                                                       |                 |
| Temperature                       | 100.15 K                                                                     |                 |
| Wavelength                        | 0.71073 Å                                                                    |                 |
| Crystal system                    | Triclinic                                                                    |                 |
| Space group                       | P-1                                                                          |                 |
| Unit cell dimensions              | a = 5.1067(9) Å                                                              | α = 80.476(4)°. |
|                                   | b = 7.1680(8) Å                                                              | β = 86.864(6)°. |
|                                   | c = 20.766(3) Å                                                              | γ = 86.423(5)°. |
| Volume                            | 747.43(19) Å <sup>3</sup>                                                    |                 |
| Z                                 | 1                                                                            |                 |
| Density (calculated)              | 1.273 Mg/m <sup>3</sup>                                                      |                 |
| Absorption coefficient            | 0.212 mm <sup>-1</sup>                                                       |                 |
| F(000)                            | 306                                                                          |                 |
| Crystal size                      | 0.33 x 0.29 x 0.24 mm <sup>3</sup>                                           |                 |
| Theta range for data collection   | 1.991 to 26.394°.                                                            |                 |
| Index ranges                      | -6 ≤ h ≤ 6, -8 ≤ k ≤ 8, -25 ≤ l ≤ 22                                         |                 |
| Reflections collected             | 6950                                                                         |                 |
| Independent reflections           | 3063 [R(int) = 0.0297]                                                       |                 |
| Completeness to theta = 25.242°   | 100.0 %                                                                      |                 |
| Absorption correction             | Semi-empirical from equivalents                                              |                 |
| Max. and min. transmission        | 0.7454 and 0.7077                                                            |                 |
| Refinement method                 | Full-matrix least-squares on F <sup>2</sup>                                  |                 |
| Data / restraints / parameters    | 3063 / 0 / 183                                                               |                 |
| Goodness-of-fit on F <sup>2</sup> | 1.064                                                                        |                 |
| Final R indices [I > 2σ(I)]       | R1 = 0.0394, wR2 = 0.0876                                                    |                 |
| R indices (all data)              | R1 = 0.0479, wR2 = 0.0920                                                    |                 |
| Extinction coefficient            | n/a                                                                          |                 |
| Largest diff. peak and hole       | 0.369 and -0.210 e.Å <sup>-3</sup>                                           |                 |

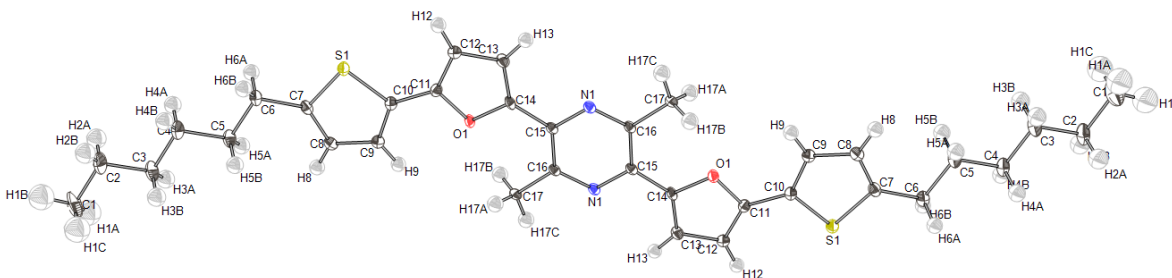

**Table S12.** Atomic coordinates ( $\times 10^4$ ) and equivalent isotropic displacement parameters ( $\text{\AA}^2 \times 10^3$ ) for MePyrz(FT)<sub>2</sub> U(eq) is defined as one third of the trace of the orthogonalized  $U_{ij}$  tensor.

|       | x        | y        | z       | U(eq) |
|-------|----------|----------|---------|-------|
| S(1)  | 5385(1)  | -551(1)  | 7560(1) | 17(1) |
| O(1)  | 124(2)   | 287(2)   | 6173(1) | 14(1) |
| N(1)  | -4532(3) | -1843(2) | 5311(1) | 13(1) |
| C(15) | -3199(3) | -418(2)  | 5459(1) | 12(1) |
| C(10) | 3385(3)  | 463(2)   | 6934(1) | 14(1) |
| C(14) | -1310(3) | -1036(2) | 5962(1) | 13(1) |
| C(12) | 1323(3)  | -2566(2) | 6723(1) | 16(1) |
| C(11) | 1721(3)  | -679(2)  | 6640(1) | 14(1) |
| C(17) | -7746(3) | -3131(2) | 4726(1) | 16(1) |
| C(9)  | 3615(3)  | 2382(2)  | 6800(1) | 17(1) |
| C(16) | -6331(3) | -1468(2) | 4859(1) | 12(1) |
| C(8)  | 5396(3)  | 3023(2)  | 7206(1) | 18(1) |
| C(7)  | 6500(3)  | 1626(2)  | 7648(1) | 16(1) |
| C(13) | -630(3)  | -2793(2) | 6287(1) | 16(1) |
| C(6)  | 8404(3)  | 1760(2)  | 8164(1) | 19(1) |
| C(4)  | 10668(4) | 3966(3)  | 8771(1) | 22(1) |
| C(3)  | 10979(4) | 6014(3)  | 8856(1) | 26(1) |

|      |          |         |         |       |
|------|----------|---------|---------|-------|
| C(5) | 8815(3)  | 3803(2) | 8236(1) | 21(1) |
| C(1) | 13084(5) | 8231(3) | 9489(1) | 40(1) |
| C(2) | 12859(4) | 6196(3) | 9382(1) | 30(1) |

---

**Table S13. Bond lengths [Å] and angles [°] for MePyrz(FT)<sub>2</sub>**

---

|               |            |
|---------------|------------|
| S(1)-C(10)    | 1.7325(16) |
| S(1)-C(7)     | 1.7353(16) |
| O(1)-C(14)    | 1.3741(18) |
| O(1)-C(11)    | 1.3702(19) |
| N(1)-C(15)    | 1.3478(19) |
| N(1)-C(16)    | 1.332(2)   |
| C(15)-C(14)   | 1.456(2)   |
| C(15)-C(16)#1 | 1.415(2)   |
| C(10)-C(11)   | 1.441(2)   |
| C(10)-C(9)    | 1.369(2)   |
| C(14)-C(13)   | 1.360(2)   |
| C(12)-H(12)   | 0.9500     |
| C(12)-C(11)   | 1.361(2)   |
| C(12)-C(13)   | 1.417(2)   |
| C(17)-H(17A)  | 0.9800     |
| C(17)-H(17B)  | 0.9800     |
| C(17)-H(17C)  | 0.9800     |
| C(17)-C(16)   | 1.503(2)   |
| C(9)-H(9)     | 0.9500     |
| C(9)-C(8)     | 1.420(2)   |
| C(8)-H(8)     | 0.9500     |
| C(8)-C(7)     | 1.359(2)   |
| C(7)-C(6)     | 1.503(2)   |
| C(13)-H(13)   | 0.9500     |
| C(6)-H(6A)    | 0.9900     |
| C(6)-H(6B)    | 0.9900     |
| C(6)-C(5)     | 1.525(2)   |
| C(4)-H(4A)    | 0.9900     |
| C(4)-H(4B)    | 0.9900     |
| C(4)-C(3)     | 1.526(2)   |
| C(4)-C(5)     | 1.521(2)   |
| C(3)-H(3A)    | 0.9900     |
| C(3)-H(3B)    | 0.9900     |
| C(3)-C(2)     | 1.521(2)   |
| C(5)-H(5A)    | 0.9900     |



|                     |            |
|---------------------|------------|
| C(5)-H(5B)          | 0.9900     |
| C(1)-H(1A)          | 0.9800     |
| C(1)-H(1B)          | 0.9800     |
| C(1)-H(1C)          | 0.9800     |
| C(1)-C(2)           | 1.523(3)   |
| C(2)-H(2A)          | 0.9900     |
| C(2)-H(2B)          | 0.9900     |
|                     |            |
| C(10)-S(1)-C(7)     | 92.35(8)   |
| C(11)-O(1)-C(14)    | 106.76(12) |
| C(16)-N(1)-C(15)    | 119.43(13) |
| N(1)-C(15)-C(14)    | 113.32(13) |
| N(1)-C(15)-C(16)#1  | 121.06(14) |
| C(16)#1-C(15)-C(14) | 125.62(14) |
| C(11)-C(10)-S(1)    | 120.80(12) |
| C(9)-C(10)-S(1)     | 110.73(12) |
| C(9)-C(10)-C(11)    | 128.44(15) |
| O(1)-C(14)-C(15)    | 119.25(13) |
| C(13)-C(14)-O(1)    | 109.71(14) |
| C(13)-C(14)-C(15)   | 131.04(14) |
| C(11)-C(12)-H(12)   | 126.7      |
| C(11)-C(12)-C(13)   | 106.62(14) |
| C(13)-C(12)-H(12)   | 126.7      |
| O(1)-C(11)-C(10)    | 115.73(13) |
| C(12)-C(11)-O(1)    | 109.99(13) |
| C(12)-C(11)-C(10)   | 134.28(15) |
| H(17A)-C(17)-H(17B) | 109.5      |
| H(17A)-C(17)-H(17C) | 109.5      |
| H(17B)-C(17)-H(17C) | 109.5      |
| C(16)-C(17)-H(17A)  | 109.5      |
| C(16)-C(17)-H(17B)  | 109.5      |
| C(16)-C(17)-H(17C)  | 109.5      |
| C(10)-C(9)-H(9)     | 123.7      |
| C(10)-C(9)-C(8)     | 112.58(15) |
| C(8)-C(9)-H(9)      | 123.7      |
| N(1)-C(16)-C(15)#1  | 119.51(14) |
| N(1)-C(16)-C(17)    | 116.19(14) |

|                     |            |
|---------------------|------------|
| C(15)#1-C(16)-C(17) | 124.30(14) |
| C(9)-C(8)-H(8)      | 122.9      |
| C(7)-C(8)-C(9)      | 114.16(15) |
| C(7)-C(8)-H(8)      | 122.9      |
| C(8)-C(7)-S(1)      | 110.16(12) |
| C(8)-C(7)-C(6)      | 129.42(15) |
| C(6)-C(7)-S(1)      | 120.42(12) |
| C(14)-C(13)-C(12)   | 106.92(14) |
| C(14)-C(13)-H(13)   | 126.5      |
| C(12)-C(13)-H(13)   | 126.5      |
| C(7)-C(6)-H(6A)     | 109.1      |
| C(7)-C(6)-H(6B)     | 109.1      |
| C(7)-C(6)-C(5)      | 112.54(14) |
| H(6A)-C(6)-H(6B)    | 107.8      |
| C(5)-C(6)-H(6A)     | 109.1      |
| C(5)-C(6)-H(6B)     | 109.1      |
| H(4A)-C(4)-H(4B)    | 107.8      |
| C(3)-C(4)-H(4A)     | 109.0      |
| C(3)-C(4)-H(4B)     | 109.0      |
| C(5)-C(4)-H(4A)     | 109.0      |
| C(5)-C(4)-H(4B)     | 109.0      |
| C(5)-C(4)-C(3)      | 112.73(15) |
| C(4)-C(3)-H(3A)     | 108.9      |
| C(4)-C(3)-H(3B)     | 108.9      |
| H(3A)-C(3)-H(3B)    | 107.8      |
| C(2)-C(3)-C(4)      | 113.19(16) |
| C(2)-C(3)-H(3A)     | 108.9      |
| C(2)-C(3)-H(3B)     | 108.9      |
| C(6)-C(5)-H(5A)     | 108.9      |
| C(6)-C(5)-H(5B)     | 108.9      |
| C(4)-C(5)-C(6)      | 113.33(15) |
| C(4)-C(5)-H(5A)     | 108.9      |
| C(4)-C(5)-H(5B)     | 108.9      |
| H(5A)-C(5)-H(5B)    | 107.7      |
| H(1A)-C(1)-H(1B)    | 109.5      |
| H(1A)-C(1)-H(1C)    | 109.5      |
| H(1B)-C(1)-H(1C)    | 109.5      |

|                  |            |
|------------------|------------|
| C(2)-C(1)-H(1A)  | 109.5      |
| C(2)-C(1)-H(1B)  | 109.5      |
| C(2)-C(1)-H(1C)  | 109.5      |
| C(3)-C(2)-C(1)   | 113.40(18) |
| C(3)-C(2)-H(2A)  | 108.9      |
| C(3)-C(2)-H(2B)  | 108.9      |
| C(1)-C(2)-H(2A)  | 108.9      |
| C(1)-C(2)-H(2B)  | 108.9      |
| H(2A)-C(2)-H(2B) | 107.7      |

---

Symmetry transformations used to generate equivalent atoms:

#1 -x-1,-y,-z+1

**Table S14. Anisotropic displacement parameters ( $\text{\AA}^2 \times 10^3$ ) for MePyrz(FT)<sub>2</sub> The anisotropic displacement factor exponent takes the form:  $-2h^2 a^* U_{11} + \dots + 2hka^* b^* U_{12}$**

|       | U11   | U22   | U33   | U23    | U13   | U12    |
|-------|-------|-------|-------|--------|-------|--------|
| S(1)  | 18(1) | 16(1) | 17(1) | -3(1)  | -5(1) | -2(1)  |
| O(1)  | 15(1) | 12(1) | 15(1) | -3(1)  | -4(1) | -2(1)  |
| N(1)  | 13(1) | 11(1) | 15(1) | -4(1)  | 1(1)  | -2(1)  |
| C(15) | 12(1) | 11(1) | 14(1) | -5(1)  | 2(1)  | -2(1)  |
| C(10) | 13(1) | 18(1) | 13(1) | -4(1)  | 0(1)  | -1(1)  |
| C(14) | 12(1) | 14(1) | 16(1) | -8(1)  | 2(1)  | -5(1)  |
| C(12) | 17(1) | 15(1) | 18(1) | -2(1)  | -2(1) | 0(1)   |
| C(11) | 13(1) | 17(1) | 12(1) | -3(1)  | -1(1) | 0(1)   |
| C(17) | 16(1) | 10(1) | 23(1) | -4(1)  | -4(1) | -3(1)  |
| C(9)  | 17(1) | 16(1) | 18(1) | -2(1)  | -3(1) | 0(1)   |
| C(16) | 11(1) | 12(1) | 15(1) | -5(1)  | 2(1)  | -2(1)  |
| C(8)  | 19(1) | 16(1) | 21(1) | -5(1)  | -2(1) | -3(1)  |
| C(7)  | 14(1) | 18(1) | 17(1) | -8(1)  | 2(1)  | -2(1)  |
| C(13) | 18(1) | 14(1) | 18(1) | -3(1)  | -1(1) | -4(1)  |
| C(6)  | 18(1) | 22(1) | 18(1) | -6(1)  | -4(1) | -2(1)  |
| C(4)  | 20(1) | 30(1) | 20(1) | -7(1)  | -2(1) | -7(1)  |
| C(3)  | 28(1) | 31(1) | 21(1) | -6(1)  | -1(1) | -14(1) |
| C(5)  | 20(1) | 25(1) | 20(1) | -4(1)  | -2(1) | -7(1)  |
| C(1)  | 51(1) | 46(1) | 28(1) | -13(1) | -1(1) | -26(1) |

C(2) 27(1) 40(1) 27(1) -15(1) -1(1) -12(1)

---

**Table S15. Hydrogen coordinates ( $\times 10^4$ ) and isotropic displacement parameters ( $\text{\AA}^2 \times 10^3$ ) for MePyrz(FT)<sub>2</sub>**

---

|        | x     | y     | z    | U(eq) |
|--------|-------|-------|------|-------|
| H(12)  | 2186  | -3540 | 7016 | 20    |
| H(17A) | -7324 | -3332 | 4275 | 24    |
| H(17B) | -9644 | -2879 | 4785 | 24    |
| H(17C) | -7193 | -4267 | 5029 | 24    |
| H(9)   | 2685  | 3195  | 6470 | 20    |
| H(8)   | 5782  | 4316  | 7172 | 22    |
| H(13)  | -1331 | -3950 | 6232 | 19    |
| H(6A)  | 10114 | 1140  | 8050 | 23    |
| H(6B)  | 7741  | 1068  | 8588 | 23    |
| H(4A)  | 12412 | 3383  | 8664 | 27    |
| H(4B)  | 9992  | 3249  | 9190 | 27    |
| H(3A)  | 11626 | 6734  | 8435 | 31    |
| H(3B)  | 9236  | 6589  | 8968 | 31    |
| H(5A)  | 9528  | 4481  | 7816 | 26    |
| H(5B)  | 7093  | 4433  | 8335 | 26    |
| H(1A)  | 13721 | 8996  | 9082 | 60    |
| H(1B)  | 14321 | 8254  | 9832 | 60    |
| H(1C)  | 11357 | 8751  | 9622 | 60    |
| H(2A)  | 14621 | 5672  | 9259 | 36    |
| H(2B)  | 12255 | 5428  | 9798 | 36    |

---

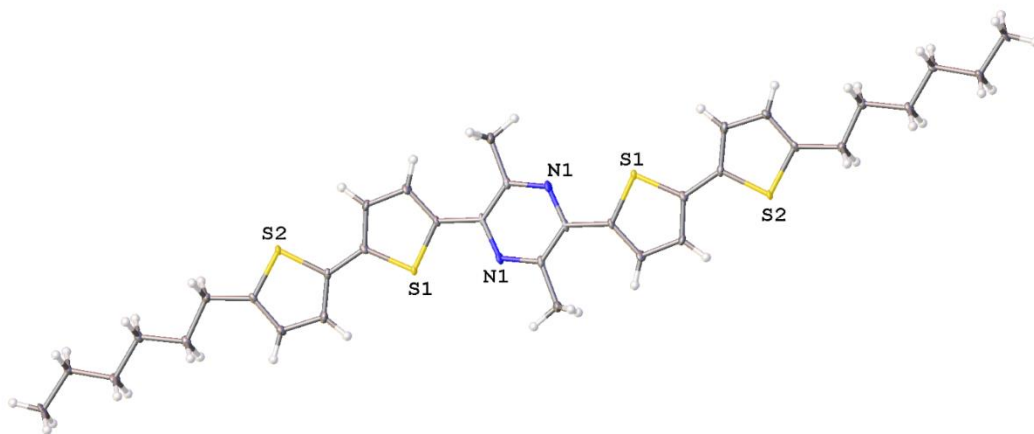

**Table S16. Crystal data and structure refinement for MePyrz(TT)<sub>2</sub>**

|                                   |                                                               |                 |
|-----------------------------------|---------------------------------------------------------------|-----------------|
| Report date                       | 2021-02-12                                                    |                 |
| Identification code               | dwat72                                                        |                 |
| Empirical formula                 | C <sub>34</sub> H <sub>40</sub> N <sub>2</sub> S <sub>4</sub> |                 |
| Molecular formula                 | C <sub>34</sub> H <sub>40</sub> N <sub>2</sub> S <sub>4</sub> |                 |
| Formula weight                    | 604.92                                                        |                 |
| Temperature                       | 100.0 K                                                       |                 |
| Wavelength                        | 0.71073 Å                                                     |                 |
| Crystal system                    | Triclinic                                                     |                 |
| Space group                       | P-1                                                           |                 |
| Unit cell dimensions              | a = 5.765(3) Å                                                | α = 80.692(8)°. |
|                                   | b = 7.688(4) Å                                                | β = 84.686(7)°. |
|                                   | c = 18.142(9) Å                                               | γ = 71.676(7)°. |
| Volume                            | 752.4(7) Å <sup>3</sup>                                       |                 |
| Z                                 | 1                                                             |                 |
| Density (calculated)              | 1.335 Mg/m <sup>3</sup>                                       |                 |
| Absorption coefficient            | 0.343 mm <sup>-1</sup>                                        |                 |
| F(000)                            | 322                                                           |                 |
| Crystal size                      | 0.29 x 0.27 x 0.1 mm <sup>3</sup>                             |                 |
| Crystal color, habit              | yellow plate                                                  |                 |
| Theta range for data collection   | 1.139 to 26.518°.                                             |                 |
| Index ranges                      | -7 ≤ h ≤ 7, -9 ≤ k ≤ 9, -22 ≤ l ≤ 22                          |                 |
| Reflections collected             | 6216                                                          |                 |
| Independent reflections           | 3083 [R(int) = 0.0486, R(sigma) = 0.0802]                     |                 |
| Completeness to theta = 25.242°   | 100.0 %                                                       |                 |
| Absorption correction             | Semi-empirical from equivalents                               |                 |
| Max. and min. transmission        | 0.677 and 0.511                                               |                 |
| Refinement method                 | Full-matrix least-squares on F <sup>2</sup>                   |                 |
| Data / restraints / parameters    | 3083 / 0 / 184                                                |                 |
| Goodness-of-fit on F <sup>2</sup> | 1.603                                                         |                 |
| Final R indices [I > 2σ(I)]       | R1 = 0.1130, wR2 = 0.3653                                     |                 |
| R indices (all data)              | R1 = 0.1232, wR2 = 0.3859                                     |                 |
| Extinction coefficient            | n/a                                                           |                 |

Largest diff. peak and hole

1.367 and -0.708 e.Å<sup>-3</sup>

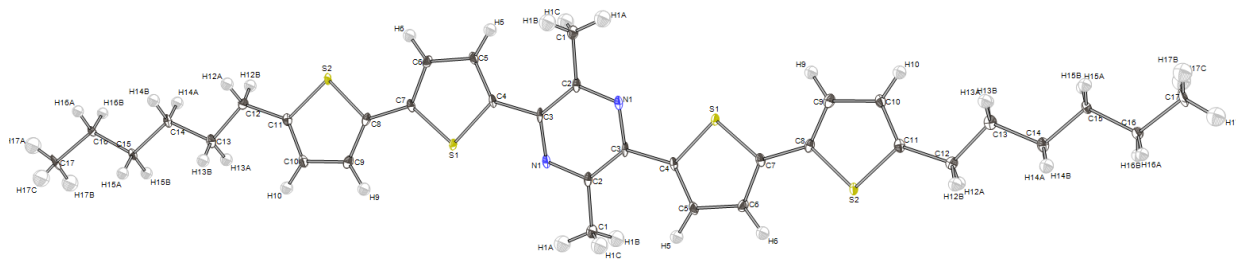

**Table S17. Atomic coordinates (x 10<sup>4</sup>) and equivalent isotropic displacement parameters (Å<sup>2</sup>x 10<sup>3</sup>) for MePyrz(TT)<sub>2</sub> U(eq) is defined as one third of the trace of the orthogonalized U<sup>ij</sup> tensor.**

|       | x         | y        | z        | U(eq) |
|-------|-----------|----------|----------|-------|
| S(1)  | 2872(3)   | 5714(2)  | 7999(1)  | 9(1)  |
| S(2)  | 1868(3)   | 8163(2)  | 5650(1)  | 10(1) |
| N(1)  | 1998(12)  | 4489(8)  | 9521(3)  | 10(1) |
| C(3)  | -78(14)   | 5743(10) | 9273(4)  | 9(2)  |
| C(8)  | 3193(14)  | 6955(10) | 6476(4)  | 9(2)  |
| C(13) | 7109(14)  | 7508(10) | 3896(4)  | 11(2) |
| C(11) | 4625(14)  | 7495(10) | 5135(4)  | 10(2) |
| C(6)  | -740(14)  | 7873(10) | 7255(4)  | 11(2) |
| C(16) | 8902(13)  | 8755(10) | 1789(4)  | 10(2) |
| C(5)  | -1705(14) | 7598(10) | 7996(4)  | 12(2) |
| C(10) | 6408(14)  | 6393(10) | 5581(4)  | 11(2) |
| C(12) | 4647(14)  | 8214(10) | 4313(4)  | 12(2) |
| C(2)  | 2128(14)  | 3733(10) | 10239(4) | 10(2) |
| C(15) | 9272(13)  | 7824(10) | 2589(4)  | 10(2) |
| C(1)  | 4534(15)  | 2331(11) | 10460(4) | 16(2) |
| C(17) | 11194(15) | 8296(11) | 1284(4)  | 18(2) |
| C(14) | 6904(14)  | 8360(10) | 3069(4)  | 12(2) |
| C(9)  | 5625(15)  | 6088(10) | 6348(4)  | 12(2) |
| C(4)  | 61(14)    | 6440(10) | 8468(4)  | 9(2)  |
| C(7)  | 1719(14)  | 6962(10) | 7163(4)  | 10(2) |

—

**Table S18. Bond lengths [Å] and angles [°] for MePyrz(TT)<sub>2</sub>.**

---

|              |           |
|--------------|-----------|
| S(1)-C(4)    | 1.729(7)  |
| S(1)-C(7)    | 1.725(8)  |
| S(2)-C(8)    | 1.734(7)  |
| S(2)-C(11)   | 1.740(7)  |
| N(1)-C(3)    | 1.341(10) |
| N(1)-C(2)    | 1.338(9)  |
| C(3)-C(2)#1  | 1.401(10) |
| C(3)-C(4)    | 1.475(9)  |
| C(8)-C(9)    | 1.366(11) |
| C(8)-C(7)    | 1.442(10) |
| C(13)-H(13A) | 0.9900    |
| C(13)-H(13B) | 0.9900    |
| C(13)-C(12)  | 1.526(10) |
| C(13)-C(14)  | 1.536(10) |
| C(11)-C(10)  | 1.347(11) |
| C(11)-C(12)  | 1.506(10) |
| C(6)-H(6)    | 0.9500    |
| C(6)-C(5)    | 1.417(10) |
| C(6)-C(7)    | 1.377(11) |
| C(16)-H(16A) | 0.9900    |
| C(16)-H(16B) | 0.9900    |
| C(16)-C(15)  | 1.513(9)  |
| C(16)-C(17)  | 1.516(10) |
| C(5)-H(5)    | 0.9500    |
| C(5)-C(4)    | 1.381(11) |
| C(10)-H(10)  | 0.9500    |
| C(10)-C(9)   | 1.428(10) |
| C(12)-H(12A) | 0.9900    |
| C(12)-H(12B) | 0.9900    |
| C(2)-C(3)#1  | 1.401(10) |
| C(2)-C(1)    | 1.506(11) |
| C(15)-H(15A) | 0.9900    |
| C(15)-H(15B) | 0.9900    |
| C(15)-C(14)  | 1.528(10) |
| C(1)-H(1A)   | 0.9800    |



|              |        |
|--------------|--------|
| C(1)-H(1B)   | 0.9800 |
| C(1)-H(1C)   | 0.9800 |
| C(17)-H(17A) | 0.9800 |
| C(17)-H(17B) | 0.9800 |
| C(17)-H(17C) | 0.9800 |
| C(14)-H(14A) | 0.9900 |
| C(14)-H(14B) | 0.9900 |
| C(9)-H(9)    | 0.9500 |

|                     |          |
|---------------------|----------|
| C(7)-S(1)-C(4)      | 92.2(4)  |
| C(8)-S(2)-C(11)     | 92.4(4)  |
| C(2)-N(1)-C(3)      | 120.0(6) |
| N(1)-C(3)-C(2)#1    | 120.6(6) |
| N(1)-C(3)-C(4)      | 113.6(6) |
| C(2)#1-C(3)-C(4)    | 125.9(7) |
| C(9)-C(8)-S(2)      | 110.4(5) |
| C(9)-C(8)-C(7)      | 129.7(7) |
| C(7)-C(8)-S(2)      | 119.9(6) |
| H(13A)-C(13)-H(13B) | 108.2    |
| C(12)-C(13)-H(13A)  | 109.8    |
| C(12)-C(13)-H(13B)  | 109.8    |
| C(12)-C(13)-C(14)   | 109.6(6) |
| C(14)-C(13)-H(13A)  | 109.8    |
| C(14)-C(13)-H(13B)  | 109.8    |
| C(10)-C(11)-S(2)    | 110.4(5) |
| C(10)-C(11)-C(12)   | 131.8(7) |
| C(12)-C(11)-S(2)    | 117.8(6) |
| C(5)-C(6)-H(6)      | 122.9    |
| C(7)-C(6)-H(6)      | 122.9    |
| C(7)-C(6)-C(5)      | 114.1(7) |
| H(16A)-C(16)-H(16B) | 107.6    |
| C(15)-C(16)-H(16A)  | 108.7    |
| C(15)-C(16)-H(16B)  | 108.7    |
| C(15)-C(16)-C(17)   | 114.0(6) |
| C(17)-C(16)-H(16A)  | 108.7    |
| C(17)-C(16)-H(16B)  | 108.7    |
| C(6)-C(5)-H(5)      | 124.2    |

|                     |          |
|---------------------|----------|
| C(4)-C(5)-C(6)      | 111.6(7) |
| C(4)-C(5)-H(5)      | 124.2    |
| C(11)-C(10)-H(10)   | 123.0    |
| C(11)-C(10)-C(9)    | 114.0(7) |
| C(9)-C(10)-H(10)    | 123.0    |
| C(13)-C(12)-H(12A)  | 108.6    |
| C(13)-C(12)-H(12B)  | 108.6    |
| C(11)-C(12)-C(13)   | 114.6(7) |
| C(11)-C(12)-H(12A)  | 108.6    |
| C(11)-C(12)-H(12B)  | 108.6    |
| H(12A)-C(12)-H(12B) | 107.6    |
| N(1)-C(2)-C(3)#1    | 119.4(7) |
| N(1)-C(2)-C(1)      | 115.9(6) |
| C(3)#1-C(2)-C(1)    | 124.7(6) |
| C(16)-C(15)-H(15A)  | 109.4    |
| C(16)-C(15)-H(15B)  | 109.4    |
| C(16)-C(15)-C(14)   | 111.4(6) |
| H(15A)-C(15)-H(15B) | 108.0    |
| C(14)-C(15)-H(15A)  | 109.4    |
| C(14)-C(15)-H(15B)  | 109.4    |
| C(2)-C(1)-H(1A)     | 109.5    |
| C(2)-C(1)-H(1B)     | 109.5    |
| C(2)-C(1)-H(1C)     | 109.5    |
| H(1A)-C(1)-H(1B)    | 109.5    |
| H(1A)-C(1)-H(1C)    | 109.5    |
| H(1B)-C(1)-H(1C)    | 109.5    |
| C(16)-C(17)-H(17A)  | 109.5    |
| C(16)-C(17)-H(17B)  | 109.5    |
| C(16)-C(17)-H(17C)  | 109.5    |
| H(17A)-C(17)-H(17B) | 109.5    |
| H(17A)-C(17)-H(17C) | 109.5    |
| H(17B)-C(17)-H(17C) | 109.5    |
| C(13)-C(14)-H(14A)  | 108.5    |
| C(13)-C(14)-H(14B)  | 108.5    |
| C(15)-C(14)-C(13)   | 115.2(7) |
| C(15)-C(14)-H(14A)  | 108.5    |
| C(15)-C(14)-H(14B)  | 108.5    |

|                     |          |
|---------------------|----------|
| H(14A)-C(14)-H(14B) | 107.5    |
| C(8)-C(9)-C(10)     | 112.9(7) |
| C(8)-C(9)-H(9)      | 123.5    |
| C(10)-C(9)-H(9)     | 123.5    |
| C(3)-C(4)-S(1)      | 117.2(6) |
| C(5)-C(4)-S(1)      | 111.6(5) |
| C(5)-C(4)-C(3)      | 131.2(7) |
| C(8)-C(7)-S(1)      | 122.7(6) |
| C(6)-C(7)-S(1)      | 110.4(5) |
| C(6)-C(7)-C(8)      | 126.8(7) |

---

Symmetry transformations used to generate equivalent atoms:

#1 -x,-y+1,-z+2

**Table S19.** Anisotropic displacement parameters ( $\text{\AA}^2 \times 10^3$ ) for MePyrz(TT)<sub>2</sub>. The anisotropic displacement factor exponent takes the form:  $-2\pi^2 [h^2 a^{*2} U^{11} + \dots + 2 h k a^* b^* U^{12}]$

|       | U11   | U22   | U33   | U23   | U13   | U12    |
|-------|-------|-------|-------|-------|-------|--------|
| S(1)  | 11(1) | 11(1) | 5(1)  | 0(1)  | 1(1)  | -4(1)  |
| S(2)  | 11(1) | 13(1) | 5(1)  | 0(1)  | 2(1)  | -3(1)  |
| N(1)  | 13(3) | 14(3) | 7(3)  | -1(2) | 2(2)  | -9(3)  |
| C(3)  | 16(4) | 9(3)  | 5(3)  | -1(3) | 2(3)  | -11(3) |
| C(8)  | 15(4) | 9(3)  | 6(3)  | -1(3) | -1(3) | -6(3)  |
| C(13) | 14(4) | 12(4) | 11(3) | -3(3) | 1(3)  | -8(3)  |
| C(11) | 13(4) | 8(3)  | 9(3)  | -4(3) | 3(3)  | -5(3)  |
| C(6)  | 13(4) | 15(4) | 7(3)  | 1(3)  | -3(3) | -6(3)  |
| C(16) | 11(4) | 10(3) | 9(3)  | -2(3) | 3(3)  | -2(3)  |
| C(5)  | 10(4) | 17(4) | 10(4) | 0(3)  | 2(3)  | -8(3)  |
| C(10) | 11(4) | 12(3) | 11(4) | -2(3) | 3(3)  | -4(3)  |
| C(12) | 12(4) | 14(4) | 9(3)  | -1(3) | -1(3) | -3(3)  |
| C(2)  | 15(4) | 12(4) | 7(3)  | -1(3) | 1(3)  | -10(3) |
| C(15) | 8(3)  | 13(4) | 12(3) | 1(3)  | 2(3)  | -7(3)  |
| C(1)  | 15(4) | 21(4) | 8(3)  | -1(3) | 0(3)  | -4(3)  |
| C(17) | 19(4) | 24(4) | 12(4) | -6(3) | 11(3) | -11(4) |
| C(14) | 14(4) | 13(4) | 10(3) | -1(3) | 3(3)  | -7(3)  |

|      |       |       |      |       |       |       |
|------|-------|-------|------|-------|-------|-------|
| C(9) | 16(4) | 13(4) | 8(3) | -1(3) | -2(3) | -6(3) |
| C(4) | 12(4) | 12(3) | 6(3) | -2(3) | 3(3)  | -7(3) |
| C(7) | 11(4) | 12(4) | 9(3) | -2(3) | 2(3)  | -8(3) |

**Table S20. Hydrogen coordinates ( $\times 10^4$ ) and isotropic displacement parameters ( $\text{\AA}^2 \times 10^{-3}$ ) for MePyrz(TT)<sub>2</sub>**

|        | x     | y     | z     | U(eq) |
|--------|-------|-------|-------|-------|
| H(13A) | 7601  | 6142  | 3938  | 14    |
| H(13B) | 8374  | 7851  | 4122  | 14    |
| H(6)   | -1705 | 8620  | 6856  | 14    |
| H(16A) | 8290  | 10112 | 1787  | 12    |
| H(16B) | 7627  | 8383  | 1582  | 12    |
| H(5)   | -3362 | 8142  | 8150  | 14    |
| H(10)  | 8041  | 5865  | 5402  | 14    |
| H(12A) | 4158  | 9583  | 4251  | 14    |
| H(12B) | 3406  | 7863  | 4078  | 14    |
| H(15A) | 10546 | 8186  | 2801  | 13    |
| H(15B) | 9851  | 6464  | 2598  | 13    |
| H(1A)  | 5635  | 2132  | 10015 | 23    |
| H(1B)  | 4259  | 1160  | 10684 | 23    |
| H(1C)  | 5273  | 2789  | 10823 | 23    |
| H(17A) | 10779 | 8824  | 766   | 26    |
| H(17B) | 11900 | 6949  | 1317  | 26    |
| H(17C) | 12385 | 8818  | 1441  | 26    |
| H(14A) | 5651  | 7985  | 2852  | 14    |
| H(14B) | 6318  | 9724  | 3041  | 14    |
| H(9)   | 6684  | 5359  | 6729  | 14    |

**Table S21. Revalent geometric parameters**

|                               | Plane to Plane Distances (Å)  | Centroid to Centroid Distances (Å) | Additional          |
|-------------------------------|-------------------------------|------------------------------------|---------------------|
| <b>Pyrz(FT)<sub>2</sub></b>   | 3.58<br>(pyrz-furan)          | 4.74                               |                     |
| <b>Pyrz(TT)<sub>2</sub></b>   | 4.81<br>(pyrz-thiophene)      | --                                 | thiophene-pi 3.22 Å |
| <b>MePyrz(FT)<sub>2</sub></b> | 3.60<br>(pyrz-furan)          | 5.43                               |                     |
| <b>MePyrz(TT)<sub>2</sub></b> | 4.48<br>(thiophene-thiophene) | 7.68                               |                     |

Crystal Maker, OLEX and BIOVIA Discovery Studio Visualizer 2019 was used to explore and identify interactions.
